# 1 **Discovery of novel haplotypes for complex traits in landraces**

2 Manfred Mayer<sup>1</sup>, Armin C. Hölker<sup>1</sup>, Eric González-Segovia<sup>1</sup>, Thomas Presterl<sup>2</sup>, Milena  
3 Ouzunova<sup>2</sup>, Albrecht E. Melchinger<sup>3</sup>, Chris-Carolin Schön<sup>1\*</sup>

4 <sup>1</sup> Plant Breeding, TUM School of Life Sciences Weihenstephan, Technical University of Munich, 85354 Freising, Germany

5 <sup>2</sup> KWS SAAT SE & Co. KGaA, 37574 Einbeck, Germany

6 <sup>3</sup> Institute of Plant Breeding, Seed Science and Population Genetics, University of Hohenheim, 70593 Stuttgart, Germany

7

8 \*Corresponding author

9 Email address: [chris.schoen@tum.de](mailto:chris.schoen@tum.de)

10

## 11 **Abstract**

12 Genetic variation is of crucial importance for selection and genetic improvement of crops.  
13 Landraces are valuable sources of diversity for germplasm improvement, but for quantitative  
14 traits efficient strategies for their targeted utilization are lacking. Here, we propose a genome-  
15 based strategy for making native diversity accessible for traits with limited genetic variation in  
16 elite germplasm. We generated ~ 1,000 doubled-haploid (DH) lines from three European maize  
17 landraces, pre-selected based on molecular and phenotypic information. Using GWAS, we  
18 mapped haplotype-trait associations for early development traits at high resolution in eleven  
19 environments. Molecular haplotype inventories of landrace derived DH libraries and a broad  
20 panel of 65 breeding lines based on 501,124 SNPs revealed novel variation for target traits in  
21 the landraces. DH lines carrying these novel haplotypes outperformed breeding lines not  
22 carrying the respective haplotypes. Most haplotypes associated with target traits showed stable  
23 effects across populations and environments and only limited correlated effects with undesired  
24 traits making them ideal for introgression into elite germplasm. Our strategy was successful in  
25 linking molecular variation to meaningful phenotypes and identifying novel variation for  
26 quantitative traits in plant genetic resources.

## 27 **Introduction**

28        Harnessing the allelic diversity of genetic resources is considered essential for overcoming  
29 the challenges of climate change and for meeting future demands on crop production<sup>1,2</sup>. For  
30 most traits of agronomic importance, modern breeding material captures only a fraction of the  
31 available diversity within crop species<sup>1</sup>. In the case of maize (*Zea mays* L.), today's elite  
32 germplasm went through several bottlenecks, first by geographical dispersion from its center  
33 of origin<sup>3,4</sup>, second through the selection of only a few key ancestors sampled from a small  
34 number of landraces to establish heterotic groups<sup>5,6</sup>, and third through decades of advanced  
35 cycle breeding with high selection intensities<sup>7,8</sup>. For traits that were not targets of selection in  
36 the past but are important today, like abiotic stress tolerance and resource-use efficiency<sup>9</sup>, this  
37 might have resulted in the loss of favorable alleles during the breeding process. In addition,  
38 unfavorable alleles might have become fixed during the selection process due to drift and/or  
39 hitchhiking effects<sup>10-12</sup>.

40        Impressive examples exist where introgression of novel alleles from genetic resources have  
41 improved mono- or oligogenic traits<sup>13-15</sup>, but for broadening the genetic diversity of complex  
42 traits such as yield or abiotic stress tolerance successful examples are scarce<sup>2</sup>. Up to date, the  
43 genomic characterization of genetic resources was predominantly based on sampling  
44 individuals across a wide range of accessions, maximizing the level of diversity in the genetic  
45 material under study<sup>2,16-20</sup>. Such diverse samples are characterized by high variation in adaptive  
46 traits and strong population structure, leading to spurious associations and limited power for  
47 detecting associations with non-adaptive traits of agronomic importance<sup>21,22</sup>. Furthermore,  
48 novel alleles which are locally common but globally rare likely remain undetected in broad,  
49 species-wide samples, whereas in a more targeted approach they might show sufficiently high  
50 frequencies for detection<sup>22</sup>.

51 Here, we propose a genome-based strategy (Supplementary Fig. 1) for making native  
52 diversity of maize landraces accessible for improving quantitative traits showing limited  
53 genetic variation in elite germplasm, such as cold tolerance and early plant development<sup>23-25</sup>.  
54 Capitalizing on low levels of linkage disequilibrium (LD) we mapped haplotype-trait  
55 associations at high resolution in ~ 1,000 doubled-haploid (DH) lines derived from three  
56 European flint maize landraces. The genetic material was pre-selected for adaptation to target  
57 environments to avoid confounding effects of strong adaptive alleles as suggested by Mayer et  
58 al.<sup>26</sup>. Novelty of promising haplotypes was assessed genotypically by quantifying their  
59 frequency in a diverse panel of 65 European flint breeding lines. Phenotypically, the direction  
60 and magnitude of haplotype effects was evaluated relative to a subset of breeding lines. Many  
61 of the discovered novel haplotypes showed stable trait associations across populations and  
62 environments. In addition, for most of them no undesired trait associations were observed,  
63 making them ideal for introgression into elite germplasm. We show that our strategy to sample  
64 comprehensively individuals from a limited set of pre-selected landraces was successful in  
65 linking molecular variation to meaningful phenotypes and in identifying novel alleles for  
66 quantitative traits in plant genetic resources.

## 67 **Results**

### 68 **Novel variation from maize landraces**

69 Our goal was to investigate if three DH libraries derived from the pre-selected landraces  
70 Kemater Landmais Gelb (KE), Lalin (LL) and Petkuser Ferdinand Rot (PE) carried novel  
71 alleles compared to a diverse panel of 65 European breeding lines, representing a large number  
72 of different source populations across Europe<sup>27</sup>. We first performed a principal coordinate  
73 analysis (PCoA) based on 501,124 single nucleotide polymorphism (SNP) markers jointly for  
74 the full set of 941 landrace derived DH and 65 European breeding lines (Fig. 1a). The first

75 principal coordinate explained 6.2% of the molecular variation and separated the landrace  
76 derived and the breeding lines based on their geographical origin within Europe from north-  
77 east (Germany) to south-west (southern France, Spain). The second principal coordinate  
78 explained 5.4% of the variation and separated the two landraces PE and KE from the panel of  
79 breeding lines.

80 In addition to the PCoA we constructed haplotypes in non-overlapping genomic windows  
81 of ten SNPs for the 941 landrace derived DH lines and the 65 European breeding lines. In total,  
82 the landrace and breeding line panels comprised 356,724 and 363,290 haplotypes (Fig. 1a)  
83 corresponding to an average of 7.12 and 7.25 haplotypes per window, respectively. As expected  
84 for genetic material originating from the same germplasm group (European flint maize),  
85 haplotype frequencies were positively correlated (Pearson's  $r = 0.74$ ,  $P < 2.2e-16$ ) between the  
86 two panels (Fig. 1b). Overall, 26.2% of the haplotypes of the landrace panel were not present  
87 in the breeding lines, indicating novel haplotype variation. For those haplotypes median and  
88 mean frequencies in the landrace panel were 0.005 and 0.039, respectively. Only 2.7% of those  
89 haplotypes occurred in all three landraces, whereas 82.8% occurred in only one landrace.  
90 Within the respective individual landraces their median and mean frequencies increased to  
91 0.065 and 0.101, respectively. The landrace panel captured 72.4% of the haplotypes present in  
92 the panel of breeding lines.

### 93 **Trait-associated genomic regions**

94 To evaluate if molecular inventories of landrace derived material are predictive for their  
95 potential to improve traits of agronomic importance, we performed haplotype based genome-  
96 wide association scans (GWAS) for nine traits. Trait-associated genomic regions were defined  
97 based on LD between significant haplotypes (Methods; Fig. 2, Supplementary Table 1). As  
98 landraces were pre-selected for variation in early plant development<sup>26,28</sup>, most associations (37  
99 to 55) were detected for the traits early vigor (EV\_V4/V6) and early plant height (PH\_V4/V6).

100 Haplotypes explained between 2% (female flowering time, FF) and 57% (lodging, LO) of the  
101 total genetic variance of the respective traits (Fig. 2). Despite the large sample size ( $n = 899$ ),  
102 the proportion of genetic variance explained might be somewhat overestimated<sup>29,30</sup> and thus  
103 has to be interpreted with caution. Only few genomic regions were detected for flowering time  
104 indicating that alleles with large effects were fixed during adaptation of the respective landraces  
105 to their geographical region, thus having little impact on GWAS for other traits.

106 Average  $r^2$  decay distances ( $r^2 < 0.2$ ) within the three DH libraries were 203 (LL), 484 (PE)  
107 and 973 kb (KE), and 201 kb for the combined set. This is consistent with previous results<sup>26</sup>  
108 and warrants high mapping resolution in the three DH libraries under study. For comparison,  
109 the diverse panel of 65 breeding lines across Europe exhibited an average  $r^2$  decay distance of  
110 107 kb. The lower LD level in the breeding line panel can be explained by admixture of many  
111 different source populations with varying linkage phases, which is generally undesired in  
112 GWAS. The median size of genomic regions associated with the nine traits under study was  
113 92 kb, with a median number of three annotated genes per region (Supplementary Fig. 2),  
114 enabling prediction of candidate genes and functional analyses. Only for a few regions ( $< 5\%$ )  
115 resolution was not optimal as they comprised more than 100 annotated genes. Mapping  
116 resolution in the three DH libraries is best demonstrated by an example of an already well  
117 characterized locus: *teosinte branched 1* (*tb1*). The gene *tb1* played a major role in the transition  
118 from highly branched teosinte to maize with strongly reduced branch development<sup>31</sup>. In our  
119 study, a strong significant association for tillering (TILL) was found in a genomic region  
120 comprising the *tb1* locus (size 1.3 Mb, including in total 22 genes; Supplementary Table 1). *In*  
121 *silico* fine mapping in the respective region (Methods) identified a 10 SNP window which  
122 overlapped perfectly with *tb1* and its regulatory upstream region.

## 123 **Effect size and stability of trait-associated haplotypes**

124 The potential of the identified haplotypes for elite germplasm improvement depends on the  
125 size and direction of their effects on the traits of interest, their environmental stability and their  
126 dependence on the genetic background. In a given trait-associated genomic region one window  
127 of 10 SNPs comprising several haplotypes was selected. Significant haplotypes, hereafter  
128 referred to as focus haplotypes, entered into a multi-environment model (Supplementary Fig.  
129 3) and were classified into “favorable”, “unfavorable” and “interacting” based on the direction  
130 and stability of their effects in the different test environments (Supplementary Fig. 4).  
131 According to this categorization scheme, a high number of favorable haplotypes for early plant  
132 development traits were found in the DH libraries (Table 1, Fig. 3a), representing potential  
133 candidates for introgression into elite germplasm. For the undesirable traits LO and TILL, most  
134 identified haplotypes were unfavorable. Overall, haplotypes identified for all nine traits showed  
135 moderate to high effect stability across environments, with similar patterns for favorable and  
136 unfavorable haplotypes (Fig. 3a,b).

137 To evaluate the dependency of haplotype effects on the genomic background, we compared  
138 effect significance and sign of the identified focus haplotypes between landraces KE and PE.  
139 From the 48 haplotypes associated with PH\_V6, comparisons could be made for 19 haplotypes  
140 present in both KE and PE. Together, these 19 haplotypes showed 115 environment-specific  
141 haplotype-trait associations, from which 35 (30%) were significant for both landraces  
142 (Supplementary Fig. 5a). All of those 35 associations had equal effect signs for both landraces.  
143 Also for the 80 environment-specific associations significant for only one of the two landraces,  
144 a large majority (90%) had equal effect signs for both landraces. Similar patterns were observed  
145 for PH\_V4 (Supplementary Fig. 5b).

## 146 **Novelty of trait-associated landrace haplotypes**

147 The ultimate criterion for assessing the usefulness of favorable landrace haplotypes for  
148 germplasm improvement is their frequency in breeding material. If favorable haplotypes are  
149 already present in high frequency in the genetic material to be improved, they are of no  
150 additional value. We assessed the frequencies of the identified trait-associated focus haplotypes  
151 in a panel of 65 breeding lines based on genotypic data. When tracking an ancestral haplotype  
152 potentially shared between landrace and breeding material, recombination might have broken  
153 up the respective haplotype, but the trait-associated causal mutation might still be present.  
154 Small genetic window sizes (mean = 0.036 cM), low values of historical recombination events  
155 (mean = 1.6) and high levels of haplotype similarity (mean = 0.29) found in the panel of  
156 breeding lines pointed to a low probability of haplotypes being broken up by recombination.

157 Frequency distributions of favorable haplotypes in the 65 breeding lines for early  
158 development traits (EV\_V4, EV\_V6, PH\_V4 and PH\_V6) are given in Fig. 4. As the  
159 haplotypes identified for each of the four single traits (Table 1) were partly from similar  
160 genomic regions, we only considered 53 favorable haplotypes with a minimum distance of  
161 1 Mb and/or  $r^2 < 0.8$ . The frequency of favorable haplotypes (mean = 0.20) was significantly  
162 increased ( $P < 0.01$ ) compared to randomly drawn haplotypes (mean = 0.16). Six favorable  
163 focus haplotypes (11%) were absent in the set of breeding lines representing potential novel  
164 variation for elite germplasm improvement. The mean frequency of 80 unfavorable haplotypes  
165 associated with early plant development did not differ significantly ( $P > 0.30$ ) from the  
166 frequency of random haplotypes. A substantial proportion of the unfavorable haplotypes  
167 (27.5%) were common in the breeding lines (Fig. 4), suggesting that a targeted substitution  
168 with favorable haplotypes could lead to further germplasm improvement.

## 169 **Linking novel haplotype variation to phenotypes**

170 To evaluate the potential of individual focus haplotypes to improve elite germplasm, we  
171 compared the phenotypic performance of landrace derived DH lines carrying focus haplotypes  
172 with a subset of breeding lines ( $n = 14$ ) tested in six locations in 2017. Exemplarily, we report  
173 the results for two genomic regions on chromosomes 3 and 9, found to affect PH\_V6 in the  
174 GWAS analysis (Fig. 5). On chromosome 3, the focus haplotype (Haplotype A in Fig. 3a and  
175 Supplementary Fig. 4) was localized in a 10 SNP window which explained 4.8% of the genetic  
176 variation for PH\_V6 and comprised eight additional haplotypes in the DH lines. The focus  
177 haplotype had a frequency of 4.1% in the DH lines, outperformed six of the eight alternative  
178 haplotypes significantly and was absent in the panel of breeding lines. 93.8% of the 65 breeding  
179 lines carried one of the six haplotypes with significant negative effects relative to the focus  
180 haplotype (on average 0.61 standard deviations) in almost all environments. The remaining  
181 breeding lines (6.2%) carried a haplotype absent in the landrace panel and thus without effect  
182 estimate. Averaged across environments, DH lines carrying the focus haplotype showed an  
183 increase of 6.06 cm over breeding lines, but the difference was not significant ( $P > 0.056$ ; Fig.  
184 5a). When looking at individual environments however, significant differences ( $P < 0.044$ )  
185 were observed for locations OLI, EIN and ROG (Supplementary Fig. 6a), which showed the  
186 lowest temperatures in the field<sup>28</sup> suggesting that the relative advantage of the identified  
187 haplotype might be temperature dependent.

188 On chromosome 9 in a genomic region of about 3 Mb, three independent focus haplotypes  
189 affected PH\_V6 significantly (two favorably, one unfavorably). One of the three focus  
190 haplotypes (Haplotype D in Fig. 3a and Supplementary Fig. 4) increased PH\_V6 compared to  
191 the six alternative haplotypes in the respective window. The genetic variance explained by the  
192 haplotypes in this window was small (1.7%) most likely due to the low frequency (0.4%) of  
193 the focus haplotype in the DH lines. The focus haplotype was absent in the panel of 65 breeding



194 lines. Instead 95.4% of the breeding lines carried one of the six inferior haplotypes, while 4.6%  
195 carried haplotypes not present in the landrace panel. DH lines carrying the focus haplotype  
196 showed a significant increase of 15.1 cm compared to the breeding lines ( $P < 0.009$ ). Similar  
197 as for the haplotype on chromosome 3, the difference was most pronounced in environments  
198 showing low temperature during early plant development (Supplementary Fig. 6b).

199 We also assessed genomic regions in more detail where the focus haplotype was  
200 unfavorable, like for example the window comprising the *tb1* locus which explained 13.1% of  
201 the genetic variance for TILL in the landrace panel. DH lines carrying the unfavorable focus  
202 haplotype showed a significant increase of 1.51 scores compared to the 14 phenotyped breeding  
203 lines not carrying the haplotype (Supplementary Fig. 7a;  $P < 0.0001$ ). Here, the focus  
204 haplotype was carried by only two of the 65 breeding lines, but for other genomic regions  
205 associated with TILL frequencies were higher, e.g. 15.5% for a region on chromosome 5  
206 explaining 6.6% of the genetic variance in the DH lines. In this case, DH lines carrying the  
207 focus haplotype showed a significant increase of 1.69 scores compared to 13 breeding lines not  
208 carrying the haplotype (Supplementary Fig. 7b;  $P < 0.0004$ ). For a genomic region on  
209 chromosome 1 associated with EV\_V4 (Supplementary Fig. 8), more than half of the 65  
210 breeding lines carried the unfavorable focus haplotype, including six of the 14 phenotyped  
211 lines. The window in which the focus haplotype was located comprised four additional  
212 haplotypes and accounted for 5.1% of the genetic variance in the DH lines. We tested the effect  
213 of the focus haplotype in the 14 breeding lines and found a significant difference of 0.875  
214 scores between lines with and without the focus haplotype ( $P < 0.039$ , Supplementary Fig. 8),  
215 indicating that a targeted substitution of the focus haplotype with one of the alternative  
216 haplotypes could lead to germplasm improvement.

217 Introducing novel alleles into elite germplasm for a target trait comes at the risk of undesired  
218 effects on other traits due to pleiotropy or linkage. We tested the identified focus haplotypes

219 for each of the early plant development traits in bivariate models for significant effects on other  
220 traits (PH\_final, FF, MF, LO and TILL,). Of the 53 favorable haplotypes referred to in Fig. 4,  
221 20 had a significant effect on at least one of the five other traits. Thereof, only three haplotypes  
222 increased LO or TILL, whereas four haplotypes slightly decreased LO or TILL. Fourteen  
223 haplotypes increased PH\_final and/or led to earlier flowering whereas one haplotype slightly  
224 delayed FF. For some of those haplotypes the effect on traits other than early plant development  
225 was substantial (e.g. haplotype “J” in Supplementary Fig. 9a increasing LO). An enrichment  
226 of such haplotypes in the breeding germplasm is therefore not advisable. In contrast, haplotypes  
227 which explained more of the genetic variance for early plant development than for other traits  
228 (e.g. haplotypes “E” or “G” in Supplementary Fig. 9a) still can be used for improving  
229 germplasm for early plant development resulting in only slightly altered flowering time and/or  
230 PH\_final. Of the 80 focus haplotypes unfavorable for early plant development (Fig. 4), 48 were  
231 significant for at least one other trait. Thereof, 14 haplotypes decreased TILL, while 40  
232 decreased PH\_final and/or delayed flowering. However, most of them had only moderate  
233 effects on these traits (Supplementary Fig. 9b). Therefore, in many cases selection against those  
234 haplotypes can still be recommended.

## 235 **Discussion**

236 The importance of genetic variation for selection and genetic improvement of crops is  
237 undisputed. Genetic resources of domesticated species, such as landraces, are a valuable source  
238 of diversity for broadening the genetic base of elite germplasm<sup>1</sup>. However, efficient strategies  
239 for utilizing this native diversity for the improvement of quantitative traits are lacking. Here,  
240 we developed a strategy to discover novel variation for quantitative traits in maize landraces  
241 (Supplementary Fig. 1). The combination of comprehensive molecular inventories and  
242 meaningful phenotypes collected in landrace derived DH libraries in multi-environment trials  
243 allowed detection of novel variation for quantitative traits exhibiting limited genetic variation

244 in elite material. Even though the DH libraries were derived from only three pre-selected  
245 populations, 26% of landrace haplotypes were absent in the panel of breeding lines representing  
246 the allelic diversity of multiple diverse source populations<sup>27</sup>. While most of these haplotypes  
247 can be expected to be neutral<sup>32</sup> or disadvantageous, some might represent useful novel  
248 variation.

249 Landraces represent self-contained populations adapted to their geographical origin<sup>33</sup>. By  
250 focusing on diversity within rather than across landraces, confounding effects of strong  
251 adaptive alleles are avoided. Consequently, individual trait-associated haplotypes are expected  
252 to have moderate to small effects only. Our results meet these expectations. The majority of  
253 haplotype-trait associations detected in the DH libraries explained less than 5% of the genetic  
254 variance for all traits under study including flowering time. However, as shown for the  
255 haplotype affecting PH\_V6 on chromosome 9 (Fig. 5b), the genetic variance explained in  
256 GWAS is not only a function of effect size but also of haplotype frequency. As DH and  
257 breeding lines were sampled from the same germplasm group (European flint maize),  
258 haplotype frequencies were positively correlated between the two panels (Fig. 1b). This  
259 exemplifies one of the key challenges when searching for novel variation for quantitative traits,  
260 as haplotypes absent in the breeding material tend to have low frequencies also in landraces  
261 with shared historical ancestry. Focusing on a set of landraces pre-selected for variation in  
262 target traits increases the chances that they harbor alleles at frequencies large enough to be  
263 detected in GWAS. The success of this strategy was reflected in the high number of significant  
264 haplotype-trait associations found for target traits early vigor and early plant height.

265 The large sample of landrace derived DH lines employed in this study enabled mapping of  
266 haplotypes with only moderate effect size and/or comparably low frequency, but as is known  
267 for GWAS studies, some of these significant trait associations might be spurious<sup>34</sup>. Here, the  
268 sequential determination of significance (Supplementary Fig. 3) should have minimized the

269 proportion of false positives<sup>35</sup>. In addition, the haplotype-based approach enabled tracking of  
270 ancestral alleles between landrace derived and breeding material and the phenotypic  
271 comparison between the two groups supported the usefulness for germplasm improvement.  
272 Nevertheless, the construction of haplotypes for identification of novel variation in landraces  
273 warrants further research. Different methods for haplotype construction exist generating  
274 population-specific haplotype blocks based on LD<sup>36,37</sup> or linkage<sup>38</sup>. Here, we used fixed  
275 window sizes, as it is advantageous in comparing haplotype frequencies across datasets varying  
276 in their extent of LD. The choice of window size depends on the available marker density and  
277 affects the number of haplotypes per window as well as the risk of haplotypes being broken up  
278 by recombination. Thus, defining the haplotype inventories of landraces and comparing them  
279 to elite germplasm is not trivial. Comprehensive sampling of individuals or lines from a limited  
280 number of landraces mitigates difficulties in haplotype construction and at the same time  
281 warrants sufficient statistical power and mapping resolution in GWAS through absence of  
282 pronounced population structure, rapid decay of LD, and consistency of linkage phases<sup>26</sup>. Here,  
283 we put this strategy into practice and showed its potential in identifying novel favorable alleles  
284 for improving quantitative traits.

285 A subset of breeding lines was evaluated together with the DH libraries. For early  
286 development traits, overall performance did not differ significantly between the two groups,  
287 but DH lines carrying specific focus haplotypes not present in breeding lines outperformed the  
288 set of breeding lines significantly in environments favoring trait differentiation. This is a first  
289 step in identifying novel haplotypes for germplasm improvement but the final proof of concept  
290 will have to come from crosses of landrace derived material with elite material. As landraces  
291 represent open-pollinated populations, background dependency of the identified trait-  
292 associated haplotypes should not be as pronounced as in mapping populations tracing back to  
293 few genetic founders such as multi- or biparental crosses. In our study, the vast majority of

294 trait-associated haplotypes occurring in landraces PE and KE had equal effect signs across  
295 landraces and environments supporting this hypothesis. In addition, for cases where it was  
296 possible to contrast different haplotypes in the breeding lines (Supplementary Fig. 8), the effect  
297 of the focus haplotype in the breeding lines was consistent with the effect in the DH lines. If  
298 the selected landraces and the target germplasm to be improved share historical ancestry, we  
299 expect only minor genetic background effects when introducing novel variation from landraces  
300 into elite material.

301 After identification of trait associations, fine mapping of the respective genomic regions and  
302 functional characterization of candidate genes is a logical next step. With a limited number of  
303 annotated genes per trait-associated genomic region, high mapping resolution was obtained in  
304 this study. The envisaged functional validation of relevant haplotypes opens many options for  
305 utilization: targeted allele mining from genetic resources, unlocking diversity trapped in  
306 disadvantageous or incompatible haplotypes, broadening the genetic diversity at relevant loci  
307 in elite germplasm and improvement of unfavorable haplotypes through gene editing<sup>39</sup>. In  
308 addition to targeted haplotype management, genome-wide approaches will also profit from  
309 functional knowledge. Pre-breeding programs<sup>2</sup> might be accelerated through the use of  
310 genome-based prediction<sup>40,41</sup>. It has been shown that prediction accuracy is increased if known  
311 trait-associations are included as fixed effects in prediction models<sup>42</sup>. As our results indicate  
312 high stability of haplotype effects across environments and genetic background as well as  
313 limited haplotype-induced correlations between traits the prospects of germplasm  
314 improvement through the use of landrace derived material are promising.

315 By successfully linking molecular inventories of landraces to meaningful phenotypes and  
316 identifying novel favorable variation for quantitative traits of agronomic importance, the results  
317 of this study represent a first step towards the long-term goal of accessing native biodiversity  
318 in an informed and targeted way. The strategy proposed in this study and demonstrated

319 experimentally with the European flint germplasm can be extended to other maize germplasm  
320 groups and even to other allogamous crop species. The key to an efficient use of genetic  
321 resources is to understand how genomic information of gene bank accessions can be translated  
322 into plant performance<sup>43</sup>. We envision a future where haplotypes characterized for their  
323 genomic structure, allele content and functional relevance can be freely moved between  
324 populations. Our goal is to create plants with novel combinations of alleles that will lead to  
325 varieties with novel combinations of traits, thus securing sustainable crop production in a  
326 changing world.

## 327 **Methods**

### 328 **Plant material**

329 We generated more than 1,000 doubled-haploid (DH) lines derived from three European  
330 maize landraces: Kemater Landmais Gelb (KE), Lalin (LL) and Petkuser Ferdinand Rot (PE)<sup>28</sup>.  
331 The landraces were pre-selected for phenotypic variation in cold-related traits assessed in field  
332 trials and population genetic analyses described by Mayer et al.<sup>26</sup>. The set of breeding lines  
333 used in this study was based on a broad panel of 68 flint lines described by Unterseer et al.<sup>27</sup>.  
334 The initial dataset included two US sweetcorn lines, IL14H and P39, which we excluded in our  
335 analyses. The remaining 66 lines, released between ~1950 and 2010, were selected to represent  
336 the genetic diversity of the European flint elite breeding germplasm. The panel also includes  
337 prominent founder lines like EP1, F2, F7 and DK105<sup>44</sup>.

### 338 **Genotypic data**

339 In total, 1,015 landrace derived DH lines were genotyped with the 600k Affymetrix®  
340 Axiom® Maize Array<sup>45</sup>. After stringent quality filtering<sup>28</sup>, 941 lines (KE = 501, LL = 31,  
341 PE = 409), and 501,124 markers mapped to B73 AGPv4<sup>46</sup> remained for genetic analyses.  
342 Remaining heterozygous calls were set to missing and all missing values were imputed

343 separately for each landrace using Beagle version 5.0<sup>47</sup> with default settings. From the set of  
344 66 breeding lines, 64 lines were genotyped with the same 600k array<sup>27</sup>, whereas for two lines  
345 (EZ5 and F64) overlapping SNP positions (85%) were extracted from the HapMap data<sup>48</sup> which  
346 is based on whole genome sequences. For making the 600k genotyping data comparable to the  
347 HapMap data, all alleles were coded according to the B73 AGPv4<sup>46</sup> forward strand. The  
348 breeding line data was filtered for the 501,124 high quality markers of the set of DH lines.  
349 Applying the same quality filter criteria as for the DH panel (heterozygous calls < 5%;  
350 callrate > 90%, except for EZ5 and F64 with callrate >84%), one breeding line (FV66) was  
351 removed due to an increased number of heterozygous calls. For the remaining 65 lines  
352 heterozygous calls were again set to missing and missing values imputed using Beagle version  
353 5.0<sup>47</sup> with default settings. For the combined set of landrace derived DH lines and breeding  
354 lines, principal coordinate analysis<sup>49</sup> (PCoA) was conducted based on modified Rogers'  
355 distances<sup>50</sup> (MRD). Pairwise  $r^2$ <sup>51</sup> between SNPs within 1 Mb distance was calculated for the  
356 DH libraries (within and across the three landraces) and the panel of breeding lines,  
357 respectively. Average LD decay distance ( $r^2 < 0.2$ ) was estimated using non-linear  
358 regression<sup>52</sup>. If not denoted otherwise, analyses were done using R version 3.6.0<sup>53</sup>.

## 359 **Phenotypic data**

360 In total, 958 DH lines were phenotyped for various traits over two years in up to eleven  
361 environments, as described by Hölker et al.<sup>28</sup>. A subset of nine traits was analyzed in this study  
362 (Supplementary Table 2), related to early plant development, maturity as well as agronomic  
363 characteristics. After stringent quality filtering<sup>28</sup>, phenotypic data of 899 DH lines (KE = 471,  
364 LL = 26, PE = 402) remained for further analyses. Additionally, 14 checks, comprising  
365 representative lines of the European flint breeding pool and included in the panel of 65  
366 genotyped breeding lines, were phenotyped in six locations in 2017<sup>28</sup>. Best linear unbiased  
367 estimates (BLUEs) for each DH line and check were calculated across environments using a

368 mixed linear model as described by Hölker et al.<sup>28</sup>. Analogously, BLUEs were calculated  
369 within each environment using the same model without environment related model terms.

### 370 **Haplotype construction**

371 For both, the landrace derived DH lines as well as the breeding lines, haplotypes were  
372 defined as a given nucleotide sequence within non-overlapping windows of 10 SNPs  
373 (Supplementary Fig. 3a). For the 600k chip, the density of SNPs along the chromosomes  
374 follows the average recombination rate<sup>45</sup>. Therefore, using a fixed number of SNPs per window  
375 leads to similar window sizes as defined based on genetic map units. The median physical  
376 window size was 17.2 kb (mean = 40.7 kb), corresponding to 0.008 cM (mean = 0.036 cM)  
377 according to a genetic map generated from a F<sub>2</sub> mapping population of a cross of  
378 EP1×PH207<sup>44</sup>. Within each window, haplotypes were coded as presence/absence markers,  
379 yielding genotype scores 0 and 2 for DH and breeding lines. To evaluate the potential of novel  
380 variation in landraces, we compared haplotype frequencies between the landrace derived DH  
381 lines and the panel of 65 breeding lines.

### 382 **Identification of trait-associated haplotypes**

383 For GWAS in the DH lines, haplotypes which were present less than three times in the panel  
384 of 899 phenotyped DH lines were excluded from the analysis. For haplotypes with  $r^2 = 1$ , only  
385 one was retained, resulting in 153,730 haplotypes used for GWAS (Supplementary Fig. 3a),  
386 with on average 5.73 haplotypes per window. The identification of trait-associated haplotypes  
387 was conducted in two steps following Millet et al.<sup>35</sup>, (i) identification of candidate haplotypes  
388 in GWAS (Supplementary Fig. 3b) and (ii) backward elimination in a multi-locus multi-  
389 environment model (Supplementary Fig. 3c). GWAS were conducted for single environments  
390 as well as across environments using the corresponding environment-specific and across-



391 environment BLUEs as response variable in the model, respectively. A univariate linear mixed  
392 model, implemented in GEMMA version 0.98.1<sup>54</sup>, was used:

$$393 \quad \mathbf{y} = \mathbf{W}\boldsymbol{\alpha} + \mathbf{x}\beta + \mathbf{Z}\mathbf{u} + \mathbf{e}$$

394 where  $\mathbf{y}$  is the  $n$ -dimensional vector of phenotypic values (BLUEs), with  $n$  being the number  
395 of lines;  $\boldsymbol{\alpha}$  is a three-dimensional vector of fixed effects (intercept and landrace effects of KE  
396 and LL);  $\beta$  is the fixed effect of the tested haplotype;  $\mathbf{x}$  is the vector of corresponding genotype  
397 scores coded as 0 and 2;  $\mathbf{u}$  is the  $n$ -dimensional vector of random genotypic effects, with  
398  $\mathbf{u} \sim N(0, K\sigma_g^2)$ ; and  $\mathbf{e}$  is the  $n$ -dimensional vector of random residual effects, with  $\mathbf{e} \sim N(0, I_n\sigma^2)$ .  
399  $K$  denotes the  $(n \times n)$  genomic relationship matrix based on SNP markers according to Astle  
400 and Balding<sup>55</sup> and  $I_n$  the  $(n \times n)$  identity matrix. Matrices  $\mathbf{W}$  ( $n \times 3$ ) and  $\mathbf{Z}$  ( $n \times n$ ) assign  
401 phenotypic values to fixed and random effects, respectively. Significance of haplotype-trait  
402 associations was assessed for each single-environment as well as for the across-environment  
403 GWAS based on the likelihood ratio test, as implemented in GEMMA, using a 15% false  
404 discovery rate<sup>56</sup> (FDR). Haplotypes with a physical distance of less than 1 Mb and in high LD  
405 ( $r^2 \geq 0.8$ ) were considered to mark the same genomic region. The corresponding trait-  
406 associated genomic region was described by the start and end positions of the first and last  
407 haplotype fulfilling the defined criteria. To represent genomic regions equally in subsequent  
408 analyses, only the most significant haplotype, the focus haplotype, was retained per region in  
409 the respective GWAS, resulting in a set of candidate haplotypes.

410 In the multi-locus, multi-environment (MLME) mixed linear model, we conducted a  
411 backward elimination of those candidate haplotypes as suggested by Millet et al.<sup>35</sup>, using the  
412 ASReml-R package version 3.0<sup>57</sup>:

$$413 \quad y_{ijk} = \mu + \omega_i + \delta_j + \sum_{q \in Q} x_{kq} \beta_q^i + u_k + e_{ijk}$$

414 where  $y_{ijk}$  is the phenotypic value (BLUE) of line  $k$  belonging to landrace  $j$  tested in  
415 environment  $i$ ;  $\mu$  is the common intercept;  $\omega_i$  is the fixed effect of environment  $i$ ;  $\delta_j$  is the fixed  
416 effect of landrace  $j$ ;  $x_{kq}$  is the genotype score (0 or 2) of line  $k$  for haplotype  $q$ ;  $\beta_q^i$  is the fixed  
417 effect of haplotype  $q$  in environment  $i$  comprising the haplotype main and haplotype by  
418 environment interaction effect, i.e.  $\beta_q^i = \beta_q + (\beta \times \omega_i)_q$ ;  $u_k$  is the random genotypic effect of  
419 line  $k$ , and  $e_{ijk}$  is the random residual error with environment-specific residual error variance.  
420  $Q$  represents the final set of haplotypes obtained through step-wise backward elimination based  
421 on the Wald test for  $\beta_q^i$ <sup>58</sup>. At each step, significance of each haplotype was tested when it was  
422 the last one entering the model and the least significant haplotype was removed if  $P \geq 0.01$ .  
423 The proportion of genetic variance explained by the set of trait-associated haplotypes was  
424 estimated by calculating the reduction in  $\sigma_g^2$  between models including and excluding the  
425 haplotype effects, following Millet et al.<sup>35</sup>. For evaluating effect stability across landraces for  
426 the final set of haplotypes  $Q$ , we estimated landrace-specific haplotype effects for each  
427 environment using the same MLME model but changing the term  $\sum_{q \in Q} x_{kq} \beta_q^i$  to  $\sum_{q \in Q} x_{kq} \beta_q^{ij}$ ,  
428 with  $\beta_q^{ij} = \beta_q + (\beta \times \omega_i \times \delta_j)_q$ .

#### 429 **Favorable and unfavorable haplotypes and their effect stability across environments**

430 The number of environments in which a haplotype was significant was estimated by  
431 generating 95% confidence intervals (CI = effect estimate  $\pm 1.96 \times$  standard error) based on  
432 the MLME model, following Millet et al.<sup>35</sup>. A CI not including 0 indicated significance of the  
433 haplotype in a given environment. Haplotypes with constant effect sign across significant  
434 environments, were classified as “favorable” or “unfavorable”. For EV\_V4, EV\_V6, PH\_V4  
435 and PH\_V6 positive (negative) effects were defined as favorable (unfavorable). For LO and  
436 TILL negative (positive) effects were defined as favorable (unfavorable). No classification was

437 made for PH\_final, FF and MF, as breeding goals vary for these traits. Haplotypes with  
438 changing sign of significant effects in different environments were classified as “interacting”.

### 439 **Haplotypes associated with multiple traits**

440 For pairwise combinations of early plant development traits with other traits, we tested if  
441 haplotypes identified for early plant development also had an effect on the respective other trait  
442 using a bivariate model, similar to Stich et al.<sup>59</sup>:

$$443 \quad y_{tijk} = \mu_t + \omega_{ti} + \delta_{tj} + x_k \beta_t + u_{tk} + e_{tijk}$$

444 where,  $y_{tijk}$  is the phenotypic value (BLUE) for trait  $t$  of line  $k$  belonging to landrace  $j$  tested  
445 in environment  $i$ ;  $\mu_t$  is the intercept for trait  $t$ ;  $\omega_{ti}$  is the fixed effect of environment  $i$  for trait  
446  $t$ ;  $\delta_{tj}$  is the fixed effect of landrace  $j$  for trait  $t$ ;  $x_k$  is the genotype score (0 or 2) of line  $k$  for  
447 the tested haplotype;  $\beta_t$  is the fixed effect of the haplotype for trait  $t$ ;  $u_{tk}$  is the random  
448 genotypic effect of line  $k$  for trait  $t$ , with  $u \sim N(0, G \otimes K)$ ; and  $e_{tijk}$  is the residual with  
449  $e \sim N(0, E \otimes I_n)$ .  $G$  and  $E$  correspond to the  $(t \times t)$  genomic and error variance-covariance  
450 matrices among traits, respectively, and  $\otimes$  denotes the Kronecker product. Haplotypes for  
451 which the 95% CIs for both  $\beta_t$  did not include 0 were considered significant for both traits.  
452 The proportion of genetic variance explained per trait by significant haplotypes was estimated  
453 by calculating the respective reduction in  $G$  between models including and excluding the  
454 haplotype.

### 455 **Comparison of trait-associated haplotypes between landraces and breeding lines**

456 We assessed frequency distributions of identified trait-associated favorable and unfavorable  
457 landrace haplotypes in the panel of 65 breeding lines and compared them with 500 haplotypes  
458 randomly drawn out of the set of haplotypes occurring at least three times in the landrace panel.  
459 Significance for differences in means between the frequencies of favorable and random  
460 haplotypes as well as unfavorable and random haplotypes was tested with the Mann-Whitney

461 test. When tracking potentially shared ancestral haplotypes between populations, the  
462 probability of a haplotype being broken up by recombination depends on the haplotype length,  
463 the recombination rate in the respective genomic region and the time since the most recent  
464 common ancestor potentially carrying that haplotype. To evaluate to which extend  
465 recombination might have occurred in the haplotypes constructed in this study, we considered  
466 the physical as well as genetic length of each haplotype and calculated haplotype similarity  
467 ( $1 - \text{haplotype heterozygosity}^{60}$ ) and the minimum number of historical recombination events<sup>61</sup>  
468 within the respective genomic windows.

469 To evaluate the effect of the selected focus haplotype relative to the alternative haplotypes  
470 in a given 10 SNP window, we followed the approach of Bustos-Korts et al.<sup>62</sup>, changing the  
471 MLME model described above to:

$$472 \quad y_{ijk} = \mu + \omega_i + \delta_j + \sum_{q \in Q'} x_{kq} \beta_q^i + x_{kh} \beta_h^i + u_k + e_{ijk}$$

473 where  $Q'$  represents the set of haplotypes  $Q$  as described above without the respective focus  
474 haplotype of the window tested,  $x_{kh}$  is the vector of haplotypes (categorical variable) in the  
475 window tested and  $\beta_h^i$  represents the effect of each haplotype in that window relative to the  
476 focus haplotype. Similar as above, significance of haplotype effects relative to the focus  
477 haplotype was determined by constructing 95% CIs. We further estimated the proportion of  
478 genetic variance explained by the given window by calculating the reduction in  $\sigma_g^2$  between the  
479 null model (without  $\sum_{q \in Q'} x_{kq} \beta_q^i + x_{kh} \beta_h^i$ ) and the model with the  $x_{kh} \beta_h^i$  term.

480 To evaluate to which extent haplotypes with favorable or unfavorable effects in landraces  
481 have also favorable or unfavorable effects in elite material, respectively, we compared  
482 performance levels between the landrace derived DH lines and the 14 breeding lines used as  
483 checks. As phenotypic data for the 14 breeding lines were only available for 2017, only the six  
484 environments from 2017 were considered. For some traits differences in means between the

485 landraces were observed<sup>28</sup>, thus comparisons were conducted for each landrace separately.  
486 Significance for differences in means between the respective landrace and the 14 checks was  
487 tested based on 10,000 permutations (two-sided test). In addition to a comparison of the overall  
488 performance level between all lines of the respective landrace and the 14 breeding lines, we  
489 compared means between groups of lines carrying a particular haplotype and lines not carrying  
490 the haplotype.

## 491 **Data availability**

492 Seeds from all genotypes used in the study are available through material transfer  
493 agreements. The genotypic data of 941 DH lines and the phenotypic data of 899 DH lines and  
494 14 breeding lines are available at <https://doi.org/10.6084/m9.figshare.12137142> (after the  
495 manuscript is accepted for publication in peer-reviewed journal). The 600k data of 63 breeding  
496 lines can be accessed at <https://dx.doi.org/10.6084/m9.figshare.3427040.v1>, while for two lines  
497 genotypic data based on whole genome sequences were downloaded from  
498 <http://cbsusrv04.tc.cornell.edu/users/panzea/download.aspx?filegroupid=34>.

## 499 **References**

- 500 1. McCouch, S. *et al.* Feeding the future. *Nature* **499**, 23 (2013).
- 501 2. Sood, S., Flint-Garcia, S., Willcox, M.C. & Holland, J.B. Mining natural variation for maize  
502 improvement: Selection on phenotypes and genes. in *Genomics of Plant Genetic Resources:  
503 Volume 1. Managing, Sequencing and Mining Genetic Resources* (eds. Tuberosa, R., Graner,  
504 A. & Frison, E.) 615-649 (Springer Netherlands, Dordrecht, 2014).
- 505 3. Mir, C. *et al.* Out of America: Tracing the genetic footprints of the global diffusion of maize.  
506 *Theor. Appl. Genet.* **126**, 2671-2682 (2013).
- 507 4. Doebley, J.F., Goodman, o.M. & Stuber, C.W. Exceptional genetic divergence of Northern  
508 Flint corn. *Am. J. Bot.* **73**, 64-69 (1986).
- 509 5. Romay, M.C. *et al.* Comprehensive genotyping of the USA national maize inbred seed bank.  
510 *Genome Biol.* **14**, R55 (2013).
- 511 6. Gouesnard, B. *et al.* Genotyping-by-sequencing highlights original diversity patterns within a  
512 European collection of 1191 maize flint lines, as compared to the maize USDA genebank.  
513 *Theor. Appl. Genet.* **130**, 2165-2189 (2017).
- 514 7. Duvick, D.N., Smith, J.S.C. & Cooper, M. Changes in performance, parentage, and genetic  
515 diversity of successful corn hybrids, 1930-2000. in *Corn: Origin, History, Technology, and  
516 Production* (eds. Smith, C.W., Betran, J. & Runge, E.C.A.) (Wiley, New York, 2004).
- 517 8. Reif, J.C. *et al.* Trends in genetic diversity among European maize cultivars and their parental  
518 components during the past 50 years. *Theor. Appl. Genet.* **111**, 838-845 (2005).

- 519 9. Lobell, D.B. & Tebaldi, C. Getting caught with our plants down: The risks of a global crop  
520 yield slowdown from climate trends in the next two decades. *Environ. Res. Lett.* **9**, 074003  
521 (2014).
- 522 10. Hartfield, M. & Otto, S.P. Recombination and hitchhiking of deleterious alleles. *Evolution* **65**,  
523 2421-2434 (2011).
- 524 11. Bouchet, S. *et al.* Association mapping for phenology and plant architecture in maize shows  
525 higher power for developmental traits compared with growth influenced traits. *Heredity* **118**,  
526 249-259 (2017).
- 527 12. Flint-Garcia, S., Jampatong, C., Darrah, L. & McMullen, M.D. Quantitative trait locus analysis  
528 of stalk strength in four maize populations. *Crop Sci.* **43**(2003).
- 529 13. Khush, G.S. Green revolution: The way forward. *Nat. Rev. Genet.* **2**, 815-822 (2001).
- 530 14. Gamuyao, R. *et al.* The protein kinase Pstol1 from traditional rice confers tolerance of  
531 phosphorus deficiency. *Nature* **488**, 535-539 (2012).
- 532 15. Bailey-Serres, J. *et al.* Submergence tolerant rice: SUB1's journey from landrace to modern  
533 cultivar. *Rice* **3**, 138-147 (2010).
- 534 16. Romero Navarro, J.A. *et al.* A study of allelic diversity underlying flowering-time adaptation  
535 in maize landraces. *Nat. Genet.* **49**, 476 (2017).
- 536 17. Yu, X. *et al.* Genomic prediction contributing to a promising global strategy to turbocharge  
537 gene banks. *Nat. Plants* **2**, 16150 (2016).
- 538 18. Huang, X. *et al.* Genome-wide association studies of 14 agronomic traits in rice landraces. *Nat.*  
539 *Genet.* **42**, 961-967 (2010).
- 540 19. Zhang, T. *et al.* Identification of loci associated with drought resistance traits in heterozygous  
541 autotetraploid alfalfa (*Medicago sativa* L.) using genome-wide association studies with  
542 genotyping by sequencing. *PLoS One* **10**, e0138931-e0138931 (2015).
- 543 20. Milner, S.G. *et al.* Genebank genomics highlights the diversity of a global barley collection.  
544 *Nat. Genet.* **51**, 319-326 (2019).
- 545 21. Zhao, K. *et al.* Genome-wide association mapping reveals a rich genetic architecture of  
546 complex traits in *Oryza sativa*. *Nat. Commun.* **2**, 467 (2011).
- 547 22. Brachi, B., Morris, G.P. & Borevitz, J.O. Genome-wide association studies in plants: The  
548 missing heritability is in the field. *Genome Biol.* **12**, 232 (2011).
- 549 23. Greaves, J.A. Improving suboptimal temperature tolerance in maize- the search for variation.  
550 *J. Exp. Bot.* **47**, 307-323 (1996).
- 551 24. Revilla, P., Butrón, A., Cartea, M.E., Malvar, R.A. & Ordas, A. Breeding for cold tolerance. in  
552 *Abiotic Stresses: Plant Resistance Through Breeding and Molecular Approaches* (eds. Ashraf,  
553 M. & Harris, P.J.C.) (The Haworth Press, Inc, New York, 2005).
- 554 25. Rodríguez, V.M., Romay, M.C., Ordás, A. & Revilla, P. Evaluation of European maize (*Zea*  
555 *mays* L.) germplasm under cold conditions. *Genet. Resour. Crop Ev.* **57**, 329-335 (2010).
- 556 26. Mayer, M. *et al.* Is there an optimum level of diversity in utilization of genetic resources? *Theor.*  
557 *Appl. Genet.* **130**, 2283-2295 (2017).
- 558 27. Unterseer, S. *et al.* A comprehensive study of the genomic differentiation between temperate  
559 Dent and Flint maize. *Genome Biol.* **17**, 137 (2016).
- 560 28. Hölker, A.C. *et al.* European maize landraces made accessible for plant breeding and genome-  
561 based studies. *Theor. Appl. Genet.* (2019).
- 562 29. Beavis, W.D. QTL analyses: Power, precision, and accuracy. in *Molecular Dissection of*  
563 *Complex Traits* (ed. H., P.A.) 145-162 (CRC Press, New York, 1998).
- 564 30. Melchinger, A.E., Utz, H.F. & Schön, C.C. Quantitative trait locus (QTL) mapping using  
565 different testers and independent population samples in maize reveals low power of QTL  
566 detection and large bias in estimates of QTL effects. *Genetics* **149**, 383 (1998).
- 567 31. Doebley, J., Stec, A. & Gustus, C. Teosinte branched1 and the origin of maize: Evidence for  
568 epistasis and the evolution of dominance. *Genetics* **141**, 333-346 (1995).
- 569 32. Kimura, M. Evolutionary rate at the molecular level. *Nature* **217**, 624-626 (1968).
- 570 33. Dwivedi, S.L. *et al.* Landrace germplasm for improving yield and abiotic stress adaptation.  
571 *Trends Plant Sci.* **21**, 31-42 (2016).
- 572 34. Korte, A. & Farlow, A. The advantages and limitations of trait analysis with GWAS: a review.  
573 *Plant Methods* **9**, 29 (2013).



- 574 35. Millet, E.J. *et al.* Genome-wide analysis of yield in Europe: Allelic effects vary with drought  
575 and heat scenarios. *Plant Physiol.* **172**, 749 (2016).
- 576 36. Gabriel, S.B. *et al.* The structure of haplotype blocks in the human genome. *Science* **296**, 2225-  
577 9 (2002).
- 578 37. Kim, S.A., Cho, C.-S., Kim, S.-R., Bull, S.B. & Yoo, Y.J. A new haplotype block detection  
579 method for dense genome sequencing data based on interval graph modeling of clusters of  
580 highly correlated SNPs. *Bioinformatics* **34**, 388-397 (2017).
- 581 38. Pook, T. *et al.* HaploBlocker: Creation of subgroup-specific haplotype blocks and libraries.  
582 *Genetics* **212**, 1045 (2019).
- 583 39. Ran, F.A. *et al.* Double nicking by RNA-guided CRISPR Cas9 for enhanced genome editing  
584 specificity. *Cell* **154**, 1380-1389 (2013).
- 585 40. Gorjanc, G., Jenko, J., Hearne, S.J. & Hickey, J.M. Initiating maize pre-breeding programs  
586 using genomic selection to harness polygenic variation from landrace populations. *BMC*  
587 *Genomics* **17**, 30 (2016).
- 588 41. Brauner, P.C. *et al.* Genomic prediction within and among doubled-haploid libraries from  
589 maize landraces. *Genetics* **210**, 1185 (2018).
- 590 42. Bernardo, R. Genomewide selection when major genes are known. *Crop Sci.* **54**, 68-75 (2014).
- 591 43. Mascher, M. *et al.* Genebank genomics bridges the gap between the conservation of crop  
592 diversity and plant breeding. *Nat. Genet.* **51**, 1076-1081 (2019).
- 593 44. Haberer, G. *et al.* European maize genomes unveil pan-genomic dynamics of repeats and genes.  
594 *bioRxiv*, 766444 (2019).
- 595 45. Unterseer, S. *et al.* A powerful tool for genome analysis in maize: Development and evaluation  
596 of the high density 600 k SNP genotyping array. *BMC Genomics* **15**, 823 (2014).
- 597 46. Jiao, Y. *et al.* Improved maize reference genome with single-molecule technologies. *Nature*  
598 **546**, 524-527 (2017).
- 599 47. Browning, B.L., Zhou, Y. & Browning, S.R. A one-penny imputed genome from next-  
600 generation reference panels. *Am. J. Hum. Genet.* **103**, 338-348 (2018).
- 601 48. Bukowski, R. *et al.* Construction of the third-generation *Zea mays* haplotype map. *Gigascience*  
602 **7**, 1-12 (2018).
- 603 49. Gower, J.C. Some distance properties of latent root and vector methods used in multivariate  
604 analysis. *Biometrika* **53**, 325-338 (1966).
- 605 50. Wright, S. *Evolution and the Genetics of Populations: Variability within and among Natural*  
606 *Populations*, (The University of Chicago Press, Chicago, IL, 1978).
- 607 51. Hill, W.G. & Robertson, A. Linkage disequilibrium in finite populations. *Theor. Appl. Genet.*  
608 **38**, 226-31 (1968).
- 609 52. Hill, W.G. & Weir, B.S. Variances and covariances of squared linkage disequilibria in finite  
610 populations. *Theor. Popul. Biol.* **33**, 54-78 (1988).
- 611 53. R Core Team. R: A language and environment for statistical computing. (R Foundation for  
612 Statistical Computing, Vienna, Austria, 2019).
- 613 54. Zhou, X. & Stephens, M. Genome-wide efficient mixed-model analysis for association studies.  
614 *Nat. Genet.* **44**, 821-4 (2012).
- 615 55. Astle, W. & Balding, D.J. Population structure and cryptic relatedness in genetic association  
616 studies. *Stat. Sci.* **24**, 451-471 (2009).
- 617 56. Benjamini, Y. & Hochberg, Y. Controlling the False Discovery Rate - a practical and powerful  
618 approach to multiple testing. *J. R. Stat. Soc. B* **57**, 289-300 (1995).
- 619 57. Butler, D., Cullis, B.R., Gilmour, A. & Gogel, B. ASReml-R reference manual. (The State of  
620 Queensland, Department of Primary Industries and Fisheries, Brisbane, 2009).
- 621 58. Kenward, M.G. & Roger, J.H. Small sample inference for fixed effects from restricted  
622 maximum likelihood. *Biometrics* **53**, 983-997 (1997).
- 623 59. Stich, B., Piepho, H.-P., Schulz, B. & Melchinger, A.E. Multi-trait association mapping in sugar  
624 beet (*Beta vulgaris* L.). *Theor. Appl. Genet.* **117**, 947-954 (2008).
- 625 60. Nei, M. & Tajima, F. DNA polymorphism detectable by restriction endonucleases. *Genetics*  
626 **97**, 145-63 (1981).
- 627 61. Hudson, R.R. & Kaplan, N.L. Statistical properties of the number of recombination events in  
628 the history of a sample of DNA sequences. *Genetics* **111**, 147-64 (1985).

629 62. Bustos-Korts, D. *et al.* Exome sequences and multi-environment field trials elucidate the  
630 genetic basis of adaptation in barley. *Plant J.* **99**, 1172-1191 (2019).

## 631 **Acknowledgements**

632 We are indebted to the technical staff at KWS SAAT SE & Co. KGaA (KWS), Misión  
633 Biológica de Galicia, Spanish National Research Council (CSIC), Technical University of  
634 Munich, and University of Hohenheim for their skilled support in carrying out the extensive  
635 phenotypic evaluation required for this study. We are grateful to Therese Bolduan (KWS) and  
636 Tanja Rettig (KWS) for their contribution in planning and conducting field trials. We thank the  
637 technical staff at KWS for DNA extraction as well as Hans Rudolf Fries (Technical University  
638 of Munich) for processing the genotyping arrays and Stefan Schwertfirm for technical  
639 assistance. This study was funded by the Federal Ministry of Education and Research (BMBF,  
640 Germany) within the scope of the funding initiative “Plant Breeding Research for the  
641 Bioeconomy” (Funding ID: 031B0195, project “MAZE”) and by KWS under Ph.D.  
642 fellowships for Manfred Mayer and Armin C. Hölker.

## 643 **Author Contributions**

644 CCS and MO, conceived the study; CCS, MO, and AEM acquired funding for the study;  
645 MM, ACH, TP, MO, AEM and CCS generated phenotypic and genotypic data; ACH  
646 contributed to analyses of phenotypic data; EG contributed to haplotype construction; MM  
647 performed analyses and drafted the manuscript; CCS edited the manuscript; all authors read  
648 and approved the final manuscript.

## 649 **Competing Interests**

650 The authors declare no competing interests.



## 651 Figures

**Fig. 1: Molecular inventories point to novel variation in landraces**

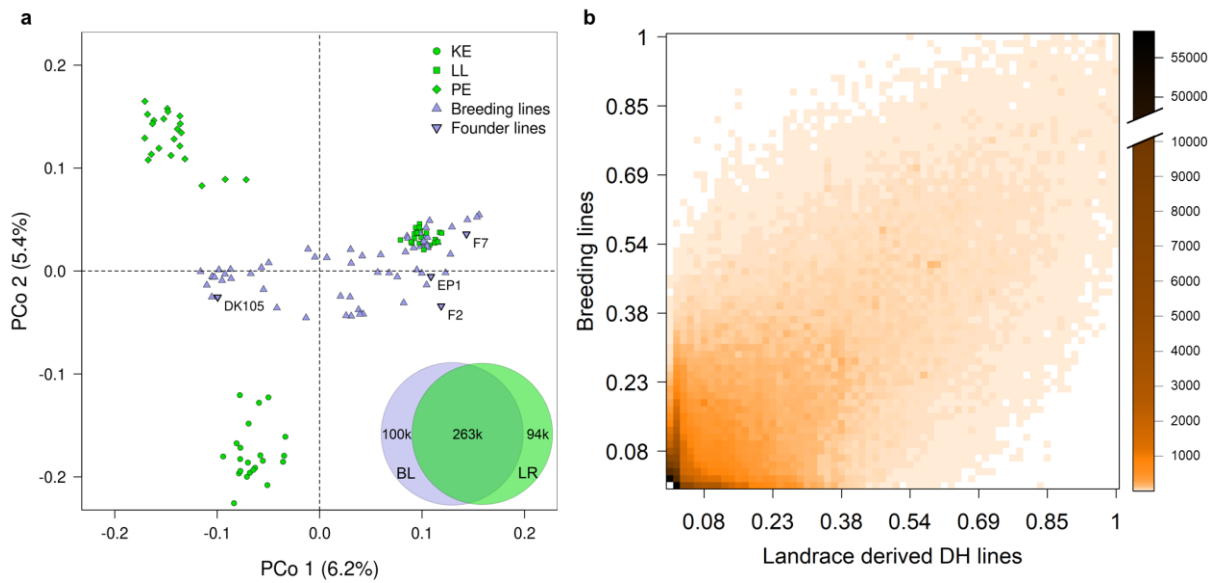

652

653 **Fig. 1: (a)** Principal coordinate analysis based on pairwise Modified Rogers' distances of 66  
654 landrace derived DH lines and 65 breeding lines. From each of three DH libraries (KE, LL and  
655 PE) 22 lines were sampled randomly. Axis labels show the percentage variance explained per  
656 principal coordinate. Venn diagram shows overlap of 456,911 haplotypes between 941 landrace  
657 derived DH lines (LR) and 65 European breeding lines (BL). Haplotypes were constructed for  
658 non-overlapping genomic windows of 10 SNPs. **(b)** Frequency of 456,911 haplotypes in DH  
659 lines (x-axis) and breeding lines (y-axis). Colors indicate the number of haplotypes within each  
660 cell of the heat map.

**Fig. 2: Results from GWAS in DH-libraries derived from maize landraces**

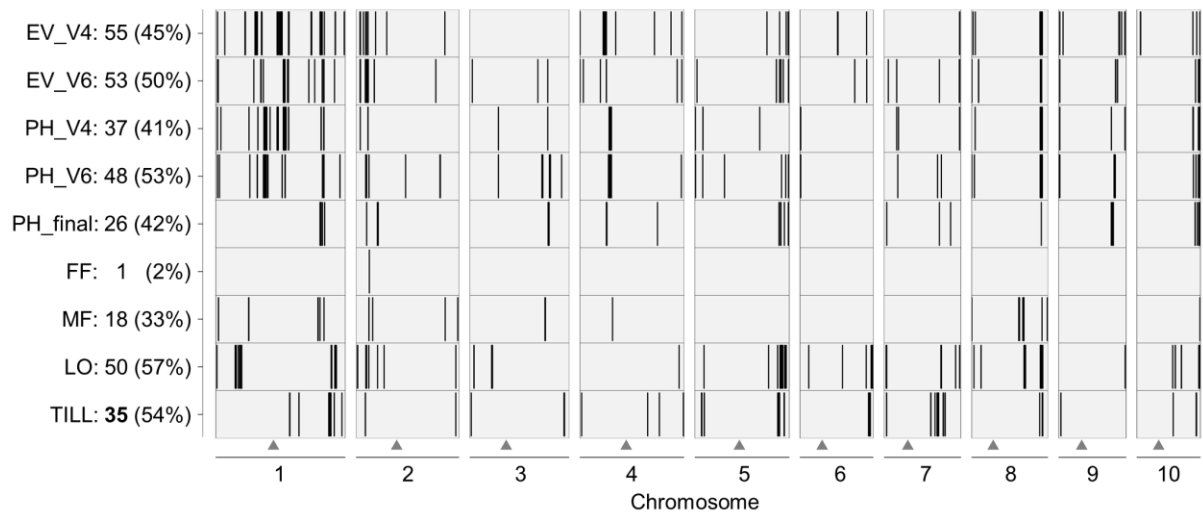

662 **Fig. 2:** Black vertical bars indicate the position of genomic regions significantly associated  
663 with nine traits (y-axis) in 899 landrace derived DH lines. The x-axis shows the ten  
664 chromosomes of maize. Triangles mark the position of the centromere for each chromosome.  
665 The y-axis indicates the trait, the number of significant regions per trait, and the percentage  
666 genetic variance explained.

**Fig. 3: Effect stability of focus haplotypes across environments**

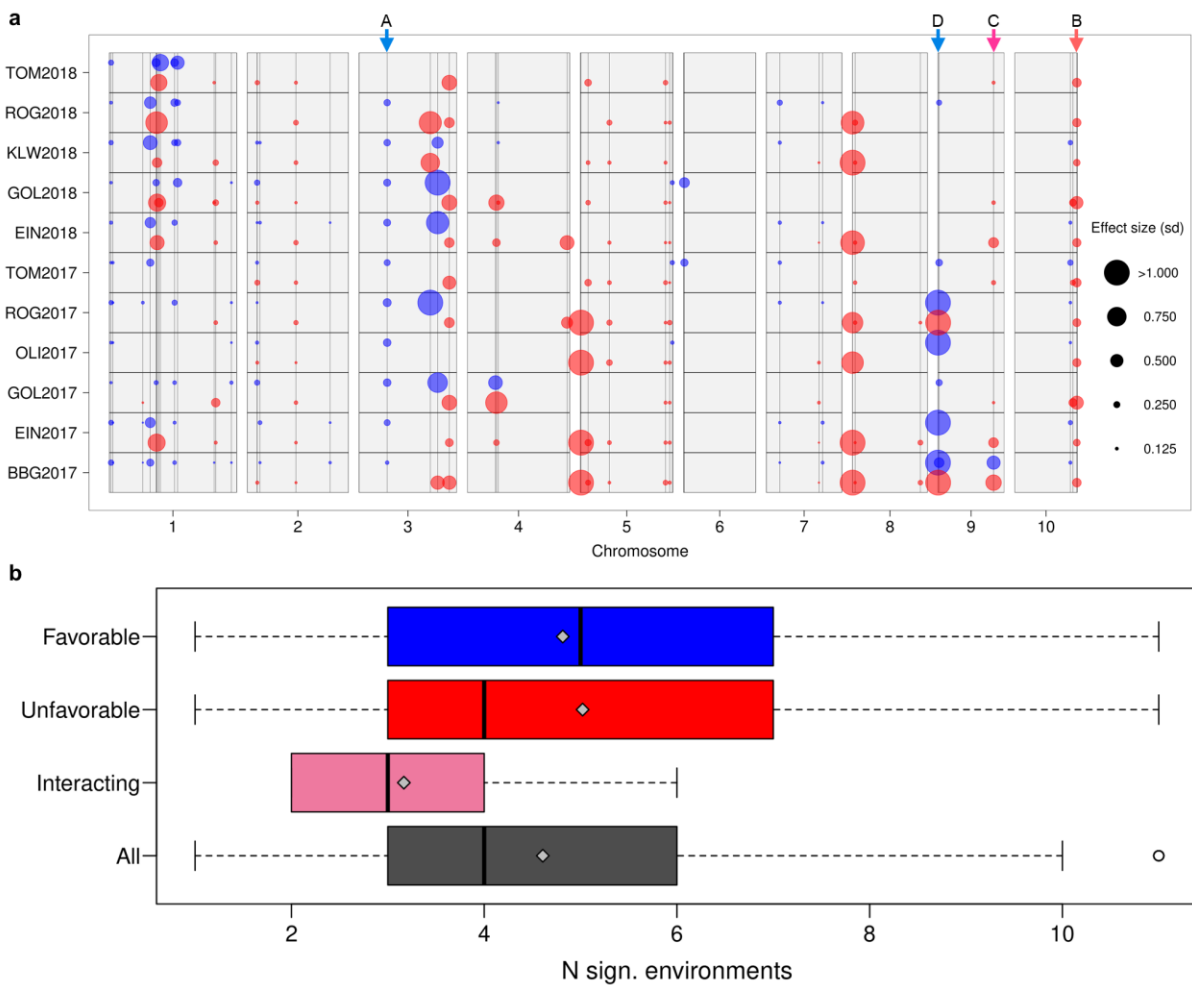

667

668 **Fig. 3: (a)** Genomic position as well as effect size and direction for 48 haplotypes associated  
669 with PH\_V6 across 11 environments. Circles indicate significant haplotypes with effect sizes  
670 given in phenotypic standard deviations. Positive and negative effects are colored in blue and  
671 red, respectively. Arrows at the top indicate the positions of haplotypes described in  
672 Supplementary Fig. 4. **(b)** Number of environments in which favorable ( $n = 65$ ), unfavorable  
673 ( $n = 93$ ), interacting ( $n = 36$ ) and all ( $n = 194$ ) haplotypes had significant effects on four early  
674 plant development traits (EV\_V4, EV\_V6, PH\_V4 and/or PH\_V6). Gray diamonds indicate  
675 means.

**Fig. 4: Frequencies of favorable and unfavorable landrace haplotypes in breeding lines**

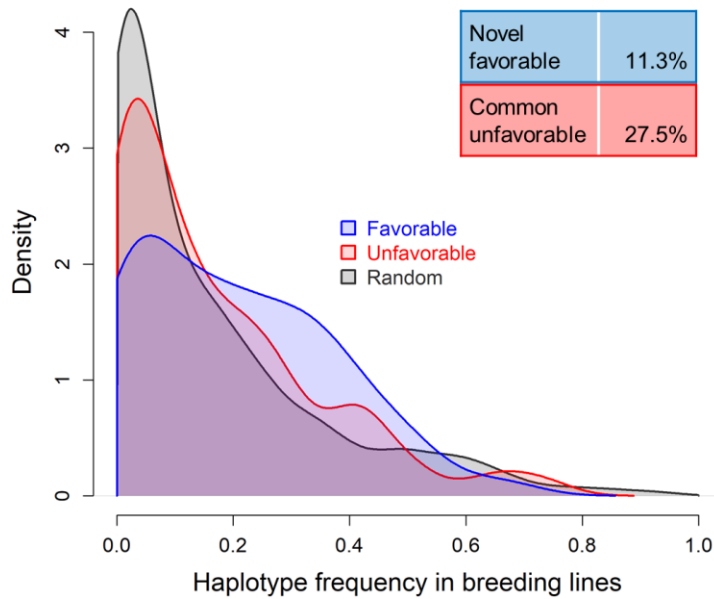

676

677 **Fig. 4:** Density estimation for favorable (n = 53, blue), unfavorable (n = 80, red) and random  
678 (n = 500, gray) haplotypes in 65 breeding lines. Haplotypes significantly associated with four  
679 early plant development traits (EV\_V4, EV\_V6, PH\_V4 and/or PH\_V6) in landrace derived  
680 DH libraries exhibiting a distance > 1 Mb and/or  $r^2 < 0.8$  were considered. Six favorable  
681 haplotypes (11.3%) were absent in the breeding lines. 22 unfavorable haplotypes (27.5%) were  
682 common in the panel of breeding lines, i.e. having a frequency larger than the upper quartile  
683 (>0.231) of random haplotypes.

**Fig. 5: Effect of favorable haplotypes not present in breeding lines on early plant development**

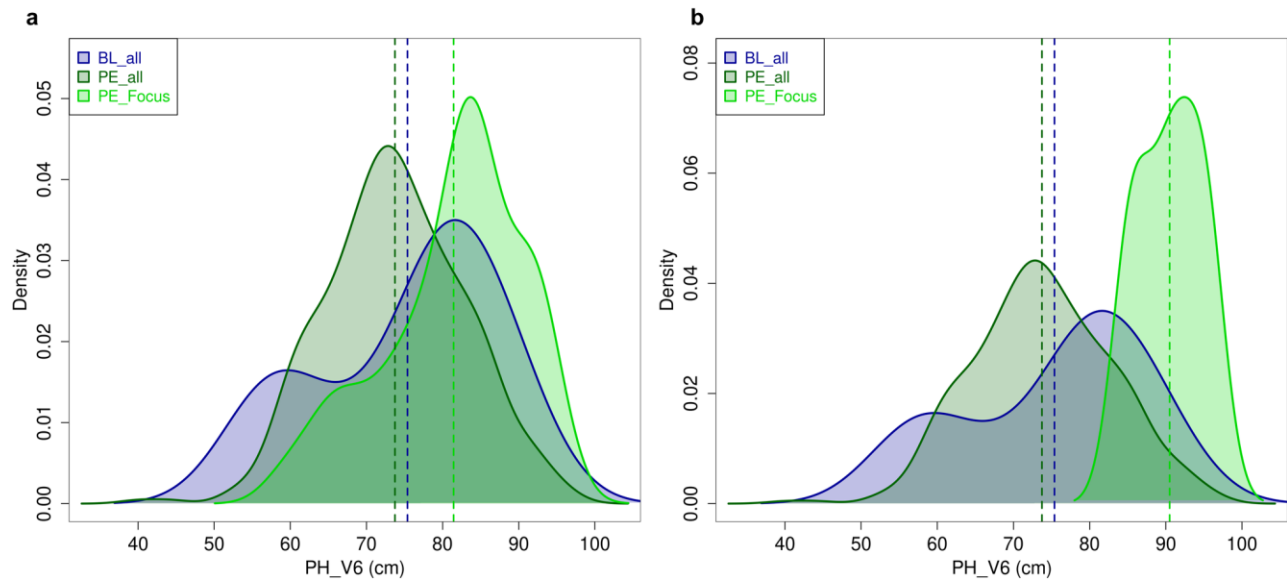

684  
 685 **Fig. 5:** Estimated densities of phenotypic values (BLUEs across locations in 2017) for PH\_V6  
 686 for 14 breeding lines (BL\_all), 402 DH lines of landrace PE (PE\_all) as well as for DH lines  
 687 of PE carrying (a) a focus haplotype on chromosome 3 (haplotype A in Fig. 3a; PE\_Focus, 38  
 688 lines) and (b) a focus haplotype on chromosome 9 (haplotype D in Fig. 3a; PE\_Focus; based  
 689 on 3 data points only). Vertical lines indicate the mean of each group. The difference in means  
 690 between BL\_all and PE\_all was not significant ( $P > 0.514$ ; permutation test).

## 691 Tables

692 **Table 1: Number and percentage of favorable, unfavorable and interacting focus**  
 693 **haplotypes per trait.** Haplotypes with consistent effect direction across environments were  
 694 categorized as favorable or unfavorable. For EV\_V4, EV\_V6, PH\_V4 and PH\_V6 positive  
 695 (negative) effects were defined as favorable (unfavorable). For LO and TILL negative  
 696 (positive) effects were defined as favorable (unfavorable). Haplotypes with changing effect  
 697 direction were categorized as interacting.

| Trait | Equal effect direction across environments |                    | Changing effect direction across environments |
|-------|--------------------------------------------|--------------------|-----------------------------------------------|
|       | Favorable, N (%)                           | Unfavorable, N (%) | Interacting, N (%)                            |
| EV_V4 | 16 (29%)                                   | 29 (53%)           | 10 (18%)                                      |
| EV_V6 | 14 (26%)                                   | 26 (49%)           | 13 (25%)                                      |
| PH_V4 | 15 (41%)                                   | 15 (41%)           | 7 (19%)                                       |
| PH_V6 | 20 (42%)                                   | 22 (46%)           | 6 (13%)                                       |
| LO    | 11 (22%)                                   | 35 (70%)           | 4 (8%)                                        |
| TILL  | 11 (31%)                                   | 23 (66%)           | 1 (3%)                                        |

698

## 699 **Supplementary Figures**

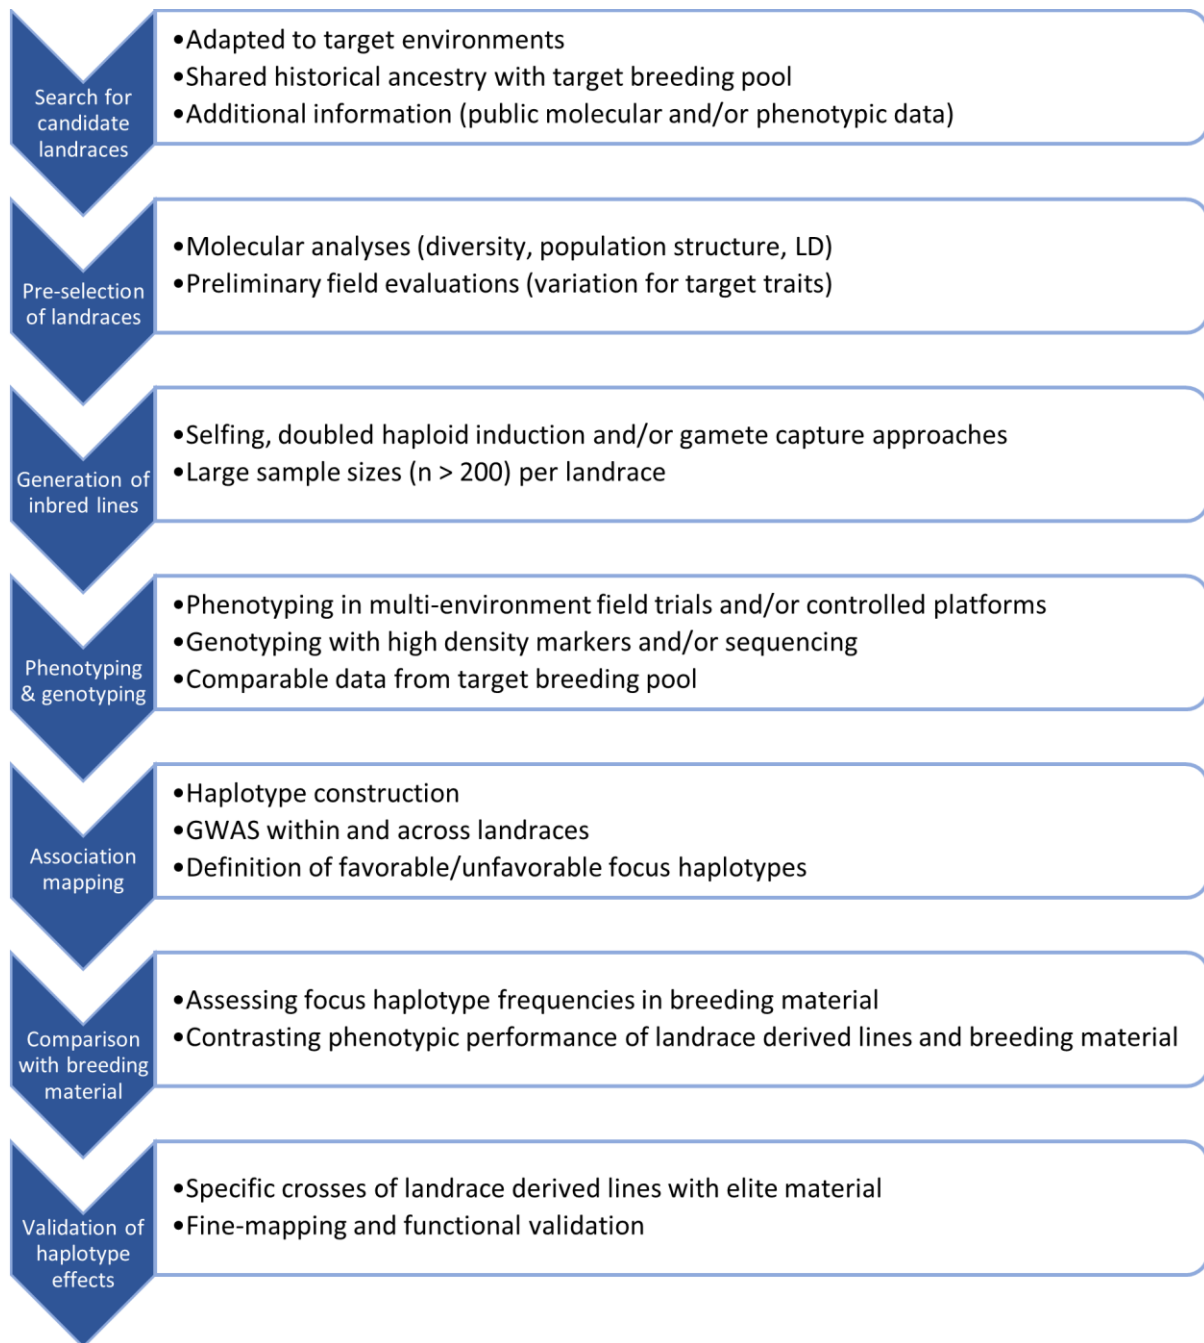

700

701 **Supplementary Fig. 1: Workflow for making native diversity of landraces accessible for**  
702 **the improvement of elite germplasm.**

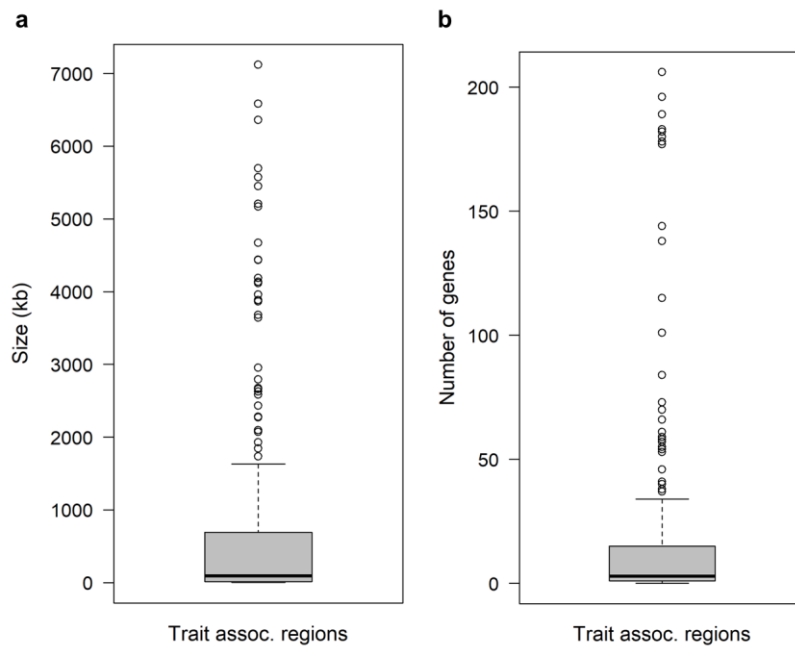

703

704 **Supplementary Fig. 2: Size (a) and number of annotated genes (b) of/in trait-associated**  
705 **genomic regions.** In total 324 genomic regions associated with the traits EV\_V4, EV\_V6,  
706 PH\_V4, PH\_V6, PH\_final, FF, MF, LO or TILL were discovered in 899 DH lines derived from  
707 three maize landraces.

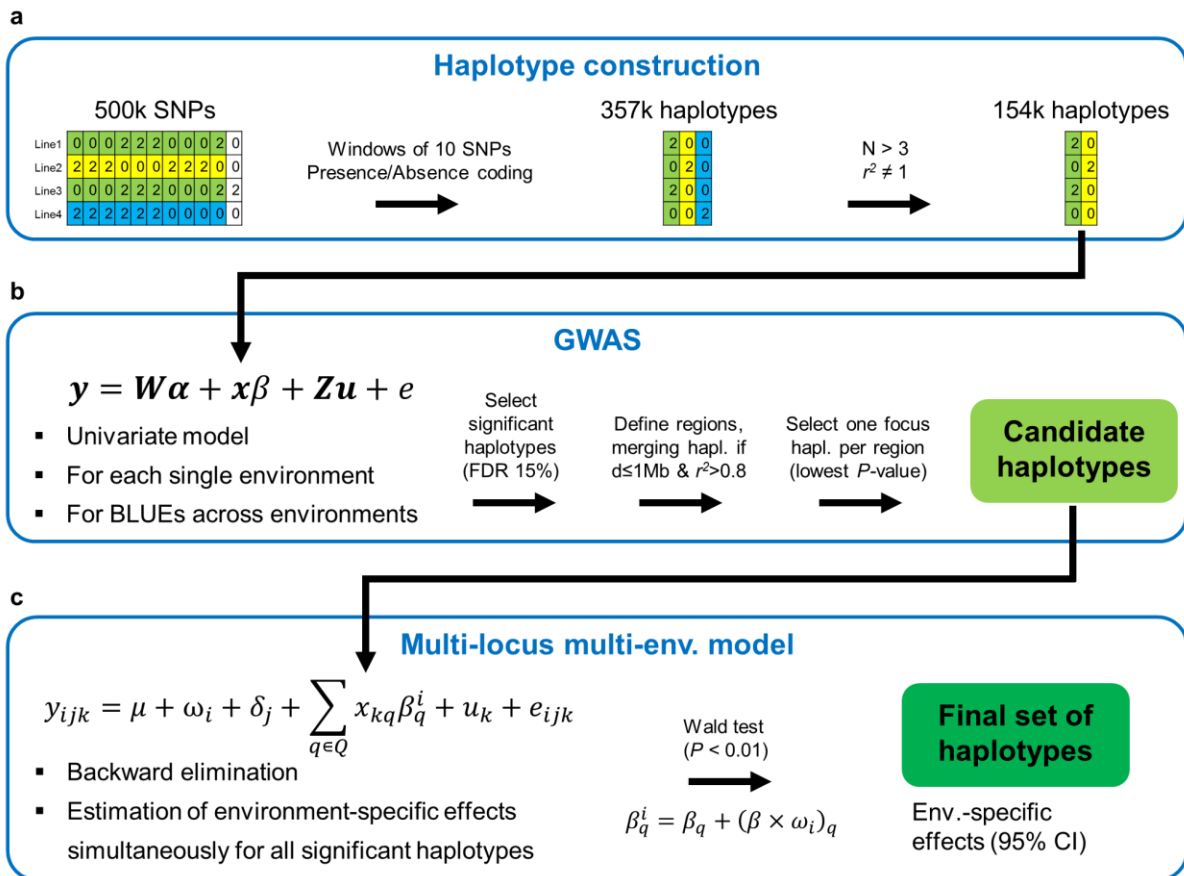

708

709 **Supplementary Fig. 3: Flowchart of experimental analyses.** (a) Construction of haplotypes.  
 710 Haplotype numbers are according to the DH panel. (b) GWAS conducted for up to 11 single  
 711 environments as well as for the across environment BLUEs for the combined set of 899  
 712 genotyped DH lines derived from three landraces. (c) Multi-locus, multi-environment model  
 713 for performing backward elimination of candidate haplotypes (Wald test) and estimating  
 714 environment-specific haplotype effects for the final set Q of focus haplotypes.



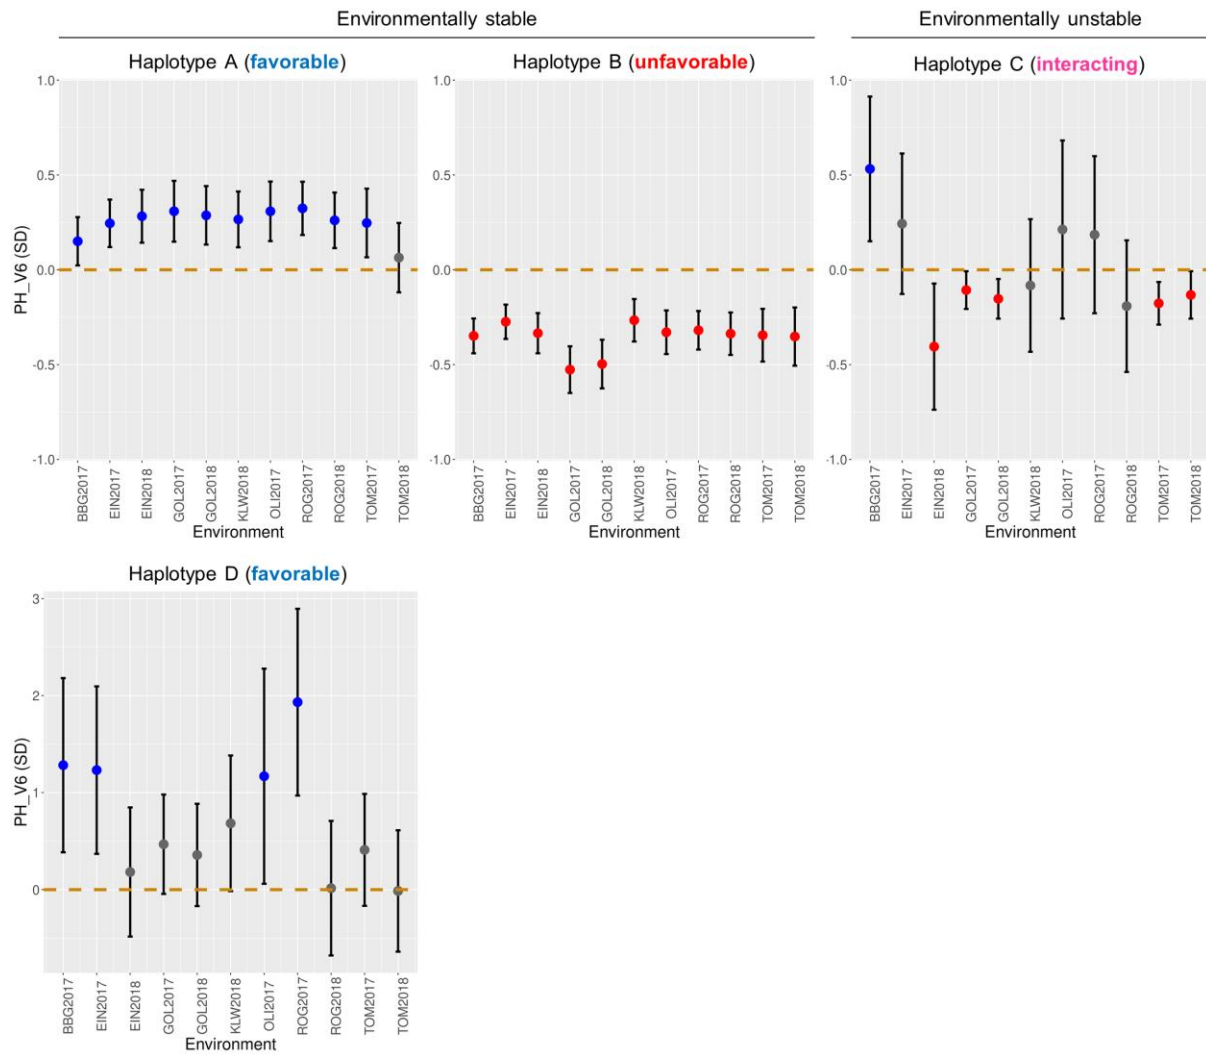

715

716 **Supplementary Fig. 4: Examples of favorable, unfavorable and interacting haplotypes.**  
 717 Environment-specific effect estimates in units of phenotypic standard deviations with  
 718 corresponding 95% confidence intervals for four haplotypes associated with PH\_V6 (positive,  
 719 negative and non-significant effects in blue, red and gray, respectively). Haplotype A on  
 720 chromosome 3 showed significant positive effects in ten out of eleven environments increasing  
 721 early plant growth, thus representing an environmentally stable favorable haplotype. Haplotype  
 722 B on chromosome 10 showed negative effects across all eleven environments, decreasing early  
 723 plant growth thus categorized as environmentally stable unfavorable haplotype. The effect sign  
 724 of haplotype C on chromosome 9 varied depending on the environment and thus it was  
 725 categorized as interacting. Haplotype D on chromosome 9 represents another example of an  
 726 environmentally stable favorable haplotype, showing positive effects in all environments  
 727 where the association was significant.

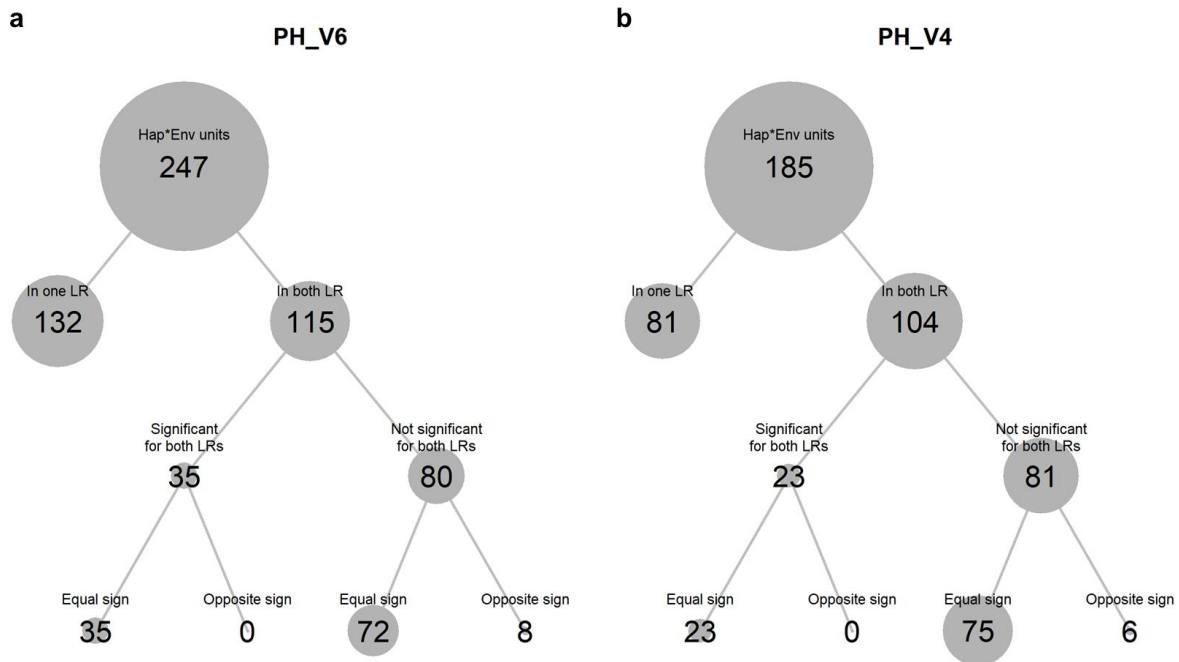

728

729 **Supplementary Fig. 5: Comparison of haplotype effects between landraces.** (a) For  
 730 PH\_V6, 46 of the 48 significantly associated haplotypes were present in at least one of the two  
 731 landraces KE and PE (two occurred only in LL). The sum of haplotype by environment  
 732 combinations for which the respective haplotypes were significant was 247. Thereof, 132  
 733 environment-specific associations resulted from 27 haplotypes only present in either KE or PE,  
 734 while 115 associations resulted from 19 haplotypes present in both landraces. Thereof, 35  
 735 associations (involving 12 haplotypes) were significant for both landraces, whereas 80  
 736 associations were significant for one landrace. All 35 associations significant for both landraces  
 737 had equal effect signs for both landraces. For the 80 associations only significant for one  
 738 landrace, 72 had equal effect signs for both landraces. (b) Analogous to (a) for PH\_V4. Here,  
 739 36 haplotypes associated to PH\_V4 were present in KE and/or PE. Thereof, 21 haplotypes were  
 740 present in both KE and PE. The 23 environment-specific associations significant for both  
 741 landraces involved 13 haplotypes.

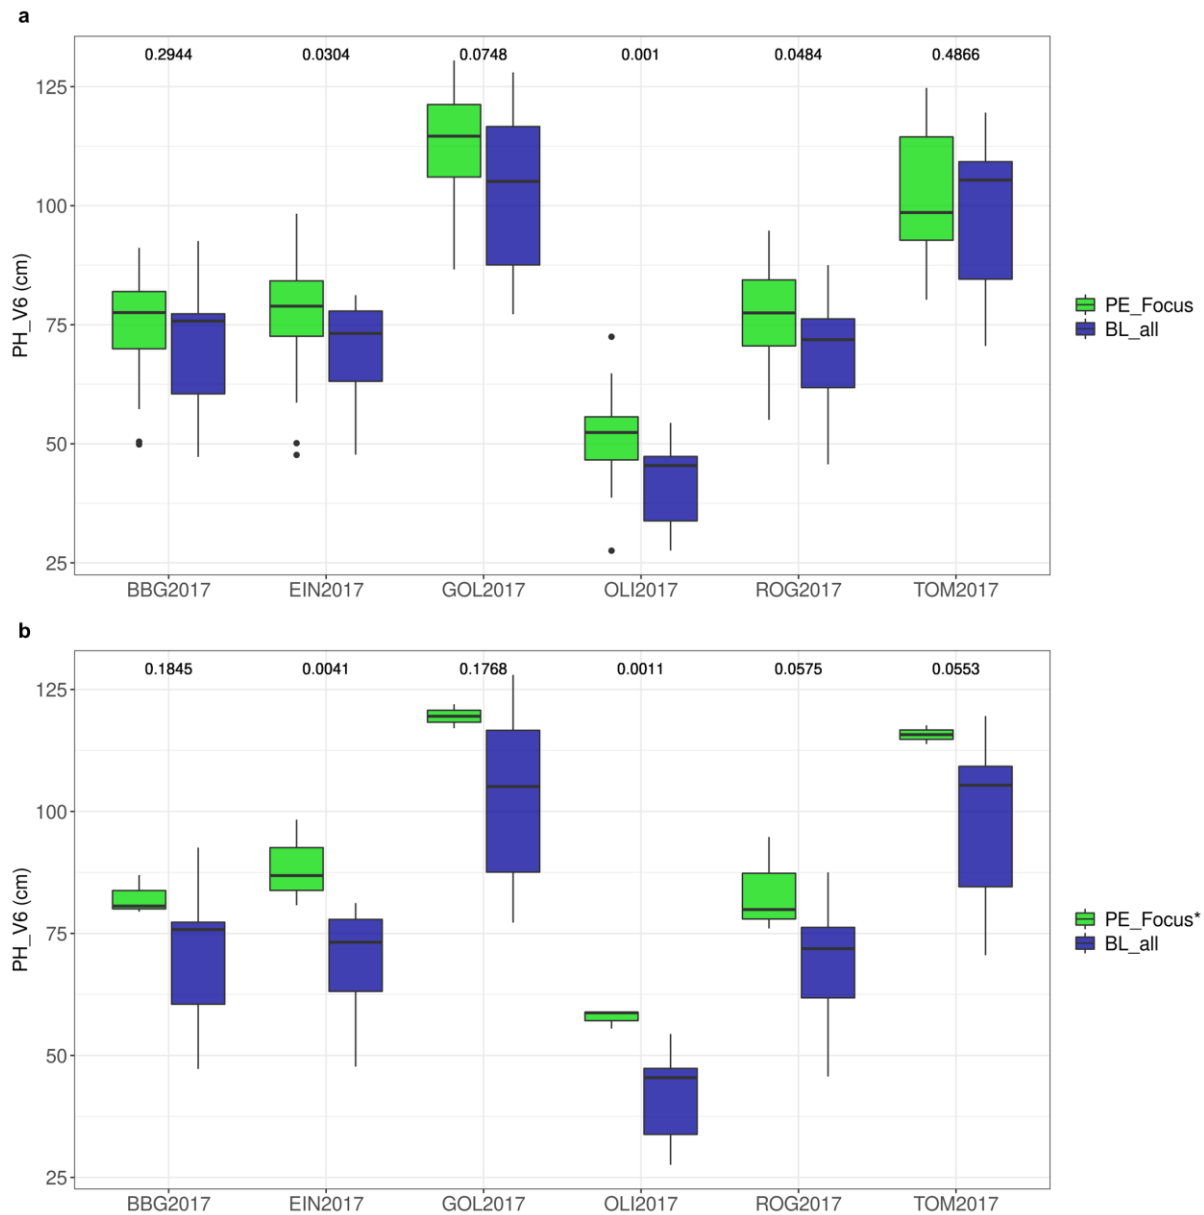

742

743 **Supplementary Fig. 6: Phenotypic values for PH\_V6 in six locations in 2017 for 14**  
744 **breeding lines (BL\_all) and a subset of DH lines derived from the landrace PE (PE\_Focus)**  
745 **carrying a focus haplotype.** The focus haplotypes in (a) and (b) refer to haplotype A and D  
746 described in Supplementary Fig. 4, respectively. Numbers on the top refer to *P*-values testing  
747 the significance of mean differences between BL\_all and PE\_Focus (permutation test). \*based  
748 on 3 data points only.

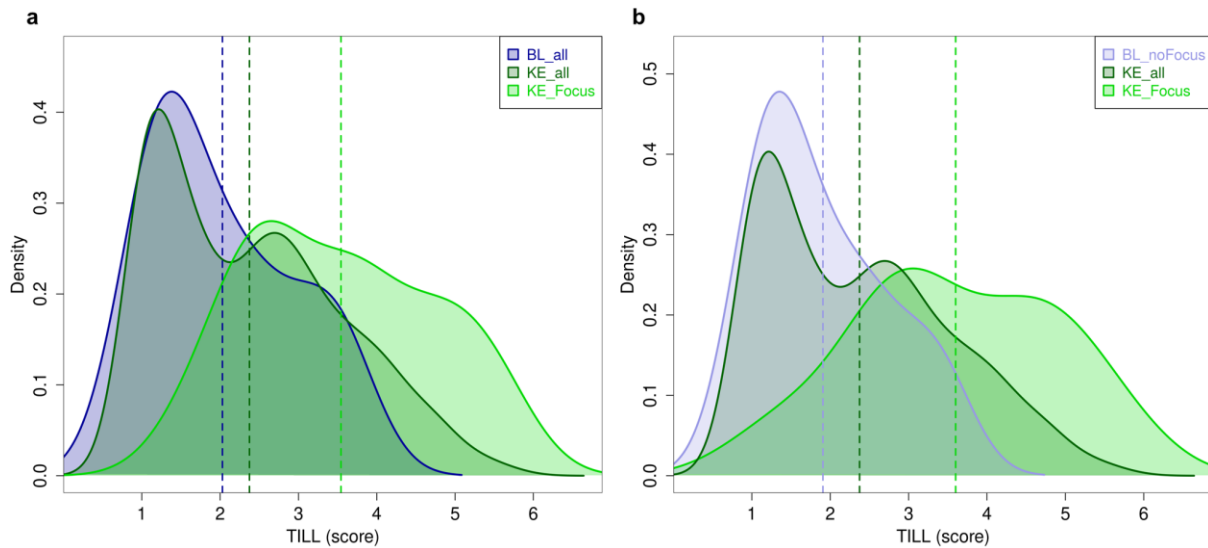

749

750 **Supplementary Fig. 7: Unfavorable focus haplotypes increasing TILL.** Estimated densities  
751 of phenotypic values (BLUEs across locations in 2017) for TILL for 14 breeding lines (BL\_all),  
752 471 DH lines of landrace KE (KE\_all) as well as for DH lines of KE carrying (a)  
753 haplotype on chromosome 1 (at the *tb1* locus; KE\_Focus, 35 lines) and (b) a focus haplotype  
754 on chromosome 5 (KE\_Focus, 16 lines). As one of the 14 breeding lines carried the focus  
755 haplotype on chromosome 5, comparisons were made with the remaining 13 lines  
756 (BL\_noFocus). Vertical lines indicate the mean of each group. The difference in means  
757 between BL\_all and KE\_all was not significant ( $P > 0.277$ ; permutation test).

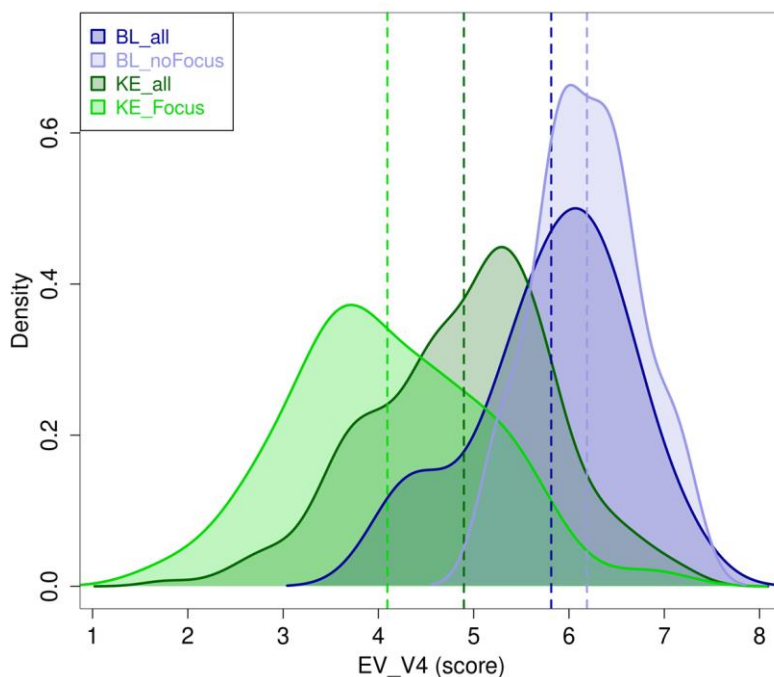

758

759 **Supplementary Fig. 8: Unfavorable focus haplotype decreasing EV\_V4 in landraces and**  
760 **breeding lines.** Estimated densities of phenotypic values (BLUEs across locations in 2017) for  
761 EV\_V4 for 14 breeding lines (BL\_all), 471 DH lines of landrace KE (KE\_all) as well as for 49  
762 DH lines of KE (KE\_Focus) carrying and eight breeding lines (BL\_noFocus) not carrying the  
763 focus haplotype on chromosome 1. Vertical lines indicate the mean of each group.

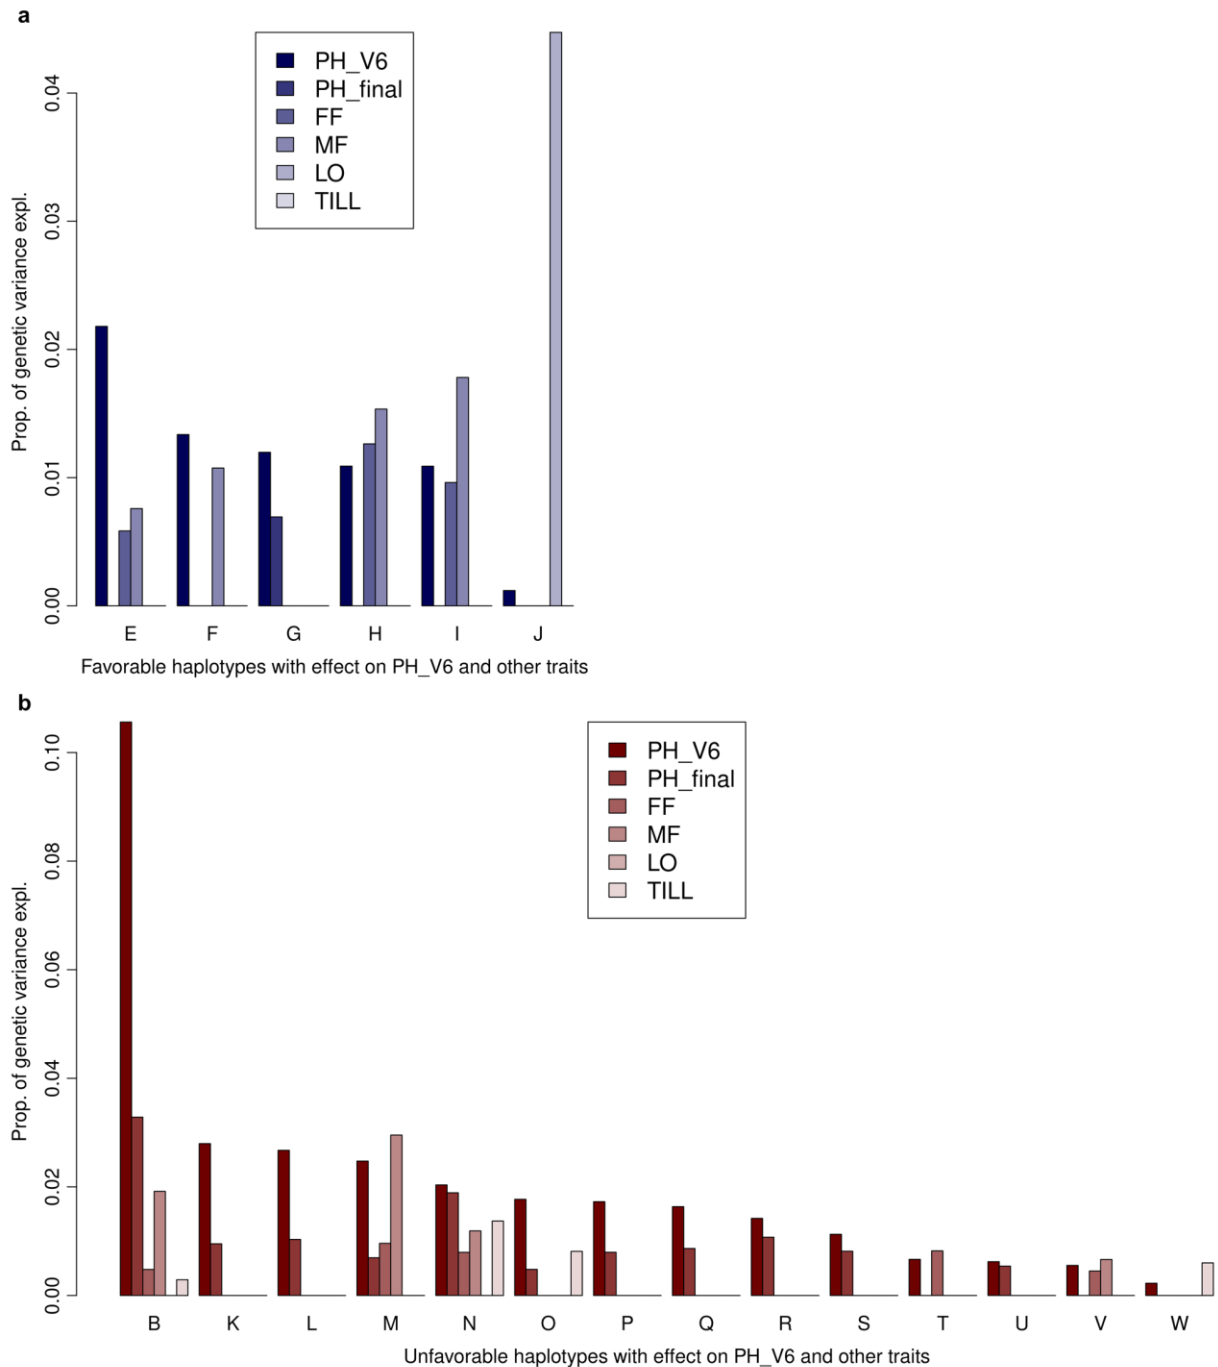

764  
765  
766  
767  
768  
769  
770

**Supplementary Fig. 9: Haplotypes with effects on multiple traits.** Proportions of explained genetic variance per trait for each of the six favorable (a) and 14 unfavorable (b) focus haplotypes associated with PH\_V6 with significant effects on PH\_final, FF, MF, LO, and/or TILL. Bars are only shown for traits for which the respective haplotype was significant. All of these haplotypes had equal effect signs for PH\_V6 and PH\_final/LO/TILL and opposite effect signs for PH\_V6 and FF/MF, respectively.

771

## 772 **Supplementary Tables**

773 **Supplementary Table 1: List of identified trait associations.** Lists for each trait the position  
 774 (chromosome, start and end) and size (kb) of each identified trait-associated genomic region as  
 775 well as the start and end positions of the selected focus haplotype. Further, the range of the  
 776 corresponding environment-specific haplotype effects (in units of environment-specific  
 777 standard deviations) together with the respective environments in which the minimum and  
 778 maximum effects were observed are shown. The table also states for each region the number  
 779 of environments in which the focus haplotype had a significant effect. Further, the number of  
 780 annotated genes within each region (including segments 5 kb upstream of genes) according to  
 781 the B73 AGPv4 reference sequence are shown.

782 **Supplementary Table 2: Overview of the phenotypic data analyzed in this study.** Lists for  
 783 each trait, the abbreviation, the way of measurement, the growth stages at which measurements  
 784 were conducted, the number of lines for which data was available and the number of  
 785 environments in which the traits were measured.

| <b>Trait</b>       | <b>Abbr.</b> | <b>Measurement</b>                                                                                                                     | <b>Growth Stages</b> | <b>N DHs</b> | <b>N Env.</b> |
|--------------------|--------------|----------------------------------------------------------------------------------------------------------------------------------------|----------------------|--------------|---------------|
| Early plant height | PH           | Total height in cm, from soil surface to highest tip of upwards stretched leaves, mean of three representative plants per plot         | V4, V6               | 899          | 11            |
| Early vigor        | EV           | Score 1-9, visual appearance of whole plot, 1 = very small plants with discolored leaves, 9 = very vigorous and healthy looking plants | V4, V6               | 899          | 11            |
| Final plant height | PH_final     | Total height in cm, from soil surface to lowest tassel branch, mean of three representative plants per plot                            | R4                   | 899          | 11            |
| Female flowering   | FF           | Days after sowing until 50% of plants show silks                                                                                       | R1                   | 899          | 10            |
| Male flowering     | MF           | Days after sowing until 50% of plants shed pollen                                                                                      | R1                   | 899          | 5             |
| Lodging            | LO           | Score 1-9, 1 = no lodging, 9 = all plants show severe lodging                                                                          | R6                   | 869          | 4             |
| Tillering          | TILL         | Score 1-9, 1 = no tillers, 9 = many and long tillers                                                                                   | V8-V10               | 899          | 5             |

786
